# Supplementary material for: Sodium Selenide Toxicity Is Mediated by O2-Dependent DNA Breaks
Source: PLoS One. 2012 May 7;7(5):e36343. doi: 10.1371/journal.pone.0036343 (PMC3346755; doi:10.1371/journal.pone.0036343)
Supplement: Methods S2 — (DOC) [file pone.0036343.s007.doc]

**Methods S2: Analysis of microarray data**

Normalized hybridization data were analyzed on the basis of several assumptions: (i) cells were grown under exponential growth conditions in rich medium and low cell density, which precludes competition effects. (ii) Most of the analyzed mutants have a growth rate close to the growth rate of the original wild-type strain. Thus, an estimation of the number of generations based on absorbance readings is reasonably accurate for the population as a whole. (iii) The Na2Se treatment globally affected the growth rate of all strains but had specific strong effects only on a relatively small number of strains.

To estimate the relative fitness defects of the mutants under Na2Se treatment, we used the ratios between the hybridization signals obtained for each mutant in a culture with Na2Se (culture A) and in a culture without Na2Se (culture B). The ratio between these signals (A/B) was deduced from the scan of a specific barcode microarray. Under the above assumptions, log2(A/B) = nA(dSe – 1) – nB(d – 1) (equation (1)), where nA and nB are the number of generations accomplished by the wild-type strain in cultures A and B, respectively; dSe is the growth defect of a given mutant in the presence of Na2Se, as compared to the wild-type (dSe = twtSe/tmutSe, where twtSe and tmutSe are the generation times of the wild-type and of the mutant in the presence of Na2Se, respectively) and d is the growth defect of this mutant in the absence of Na2Se (d = twt/tmut, where twt and tmut are the generation times of the two compared strains in the absence of Na2Se). nA and nB can be deduced from the growth curves of the two cultures. To analyze our sets of data, we calculated a score, s, defined as s = dSe – d + 1. With the wild-type, d = dSe = 1 and the score is equal to 1. A slow-growing strain which has identical growth defects in the presence and in the absence of Na2Se (dSe = d) also has a score of 1. A strain more sensitive to Na2Se than the wild-type (dSe < d) has a score lower than 1. If nA ≠ nB, equation (1) is not sufficient to calculate s. The growth defect of the mutant in the absence of Na2Se (d) must be known. This value was obtained for each mutant by comparing hybridization data from samples of the culture without Na2Se at t = 0 (sample C) and t = 16 h (sample D), using the equation log2(C/D) = n(1 – d), where C and D are the hybridization signals measured with the two samples and n is the number of generations accomplished by the wild-type during 16 h.

We calculated s values corresponding to four different conditions of Na2Se treatments (1 or 2 µM Na2Se treatment of cultures grown for either 16 or 27 h), with the Na2Se-free culture grown for 16 h as the reference. Because of too low signal-to-noise ratios when measuring hybridization signals, four s values could not always been obtained for each mutant strain. We computed the median of the s values when 3 or 4 culture conditions were available (Supplementary Table 1). The relative fitness defect was defined as the log2 value of s. With 267 mutants, we could not obtain data for more than two culture conditions. Results with such mutants were not used for further analyses.
