# Supplementary material for: Sodium Selenide Toxicity Is Mediated by O2-Dependent DNA Breaks
Source: PLoS One. 2012 May 7;7(5):e36343. doi: 10.1371/journal.pone.0036343 (PMC3346755; doi:10.1371/journal.pone.0036343)
Supplement: Table S2 — Weights used to filter the microarray data. (XLS) [file pone.0036343.s005.xls]

## Sheet: description
Peyroche et al.
Weights used to filter the raw data
The "weights" sheet lists the DNA sequences chosen to design the Agilent microarray. Also shown are the weights that were used for the final calculation of results. For a given mutant, the hybridization signal used for further calculations was the weighted mean of the values obtained with the corresponding barcodes (up and down if available)

## Sheet: weights
ProbeID	Sequence	weight
YAL001C-U	ACTATATGTGAAGGCATGGC	0.991323
YAL002W-U	ATACTGACAGCACGCATGGC	0.44245
YAL003W-U	GACATATCAGCATACATGGC	0.961847
YAL004W-U	TATGGCACGGCAGACATTCC	0.980128
YAL005C-U	AGGCATACTACACAGATTCC	0.996051
YAL007C-U	GAGTGATCCATACACATTCC	0.332945
YAL008W-U	ATGAACTTGCGCTCAATTCC	0.990758
YAL009W-U	GCCAGATCATCAATAGGCAC	0.8126
YAL010C-U	CACTATATGTCAACAGGCAC	0.996324
YAL011W-U	CAGTAATCAGAAGCTCGCAC	0.912101
YAL012W-D	ATCATACGTCAGCCCAGATG	0.98786
YAL012W-U	TAGCACACGGTCGAATTTCC	0.979099
YAL013W-U	GATACGCGCCAATCTCTATA	0.540052
YAL014C-U	CCGCATACCGAATTGCTATA	0.94451
YAL015C-U	GCGCAGAAGGCAATGCTATA	0.993104
YAL016W-D	CACTTATTAGGAGGCAGATG	0.19521
YAL016W-U	CGCCTAAGACCGGATAAAGC	0.0872813
YAL017W-U	GCACATCTGACAACAGGCGA	0.981479
YAL018C-U	CATACACGTAAAGTGCGCGA	0.991133
YAL019W-U	TGCACAGCGACAATACGCGA	0.987239
YAL020C-U	CGATTCGATAAATGACGCGA	0.95722
YAL021C-U	CAGTCGATCACAAGCGAGCA	0.234608
YAL022C-U	CCGTCGTATAAATGAGAGCA	0.99463
YAL023C-U	CTGCCATGCGAACAAGAGCA	0.478665
YAL024C-D	AAACCCGCAGGATGCAGATG	0.992945
YAL024C-U	TGATCCCACACATATAGAGC	0.992249
YAL025C-U	TGCCGCATCAAAGAGGCCAA	0.986111
YAL026C-U	GCGCCATGCAAATGAGCCAA	0.987911
YAL027W-U	CGTGTCAGCAAATCTACCAA	0.987917
YAL028W-U	GGTCTGCTCAAATACACCAA	0.978038
YAL029C-U	CTATGTGCGCGATGCGTCTT	0.993046
YAL030W-U	AGACGTGATTCAGCTCTCTT	0.994652
YAL031C-U	AGGCGCGTGCTATATCTCTT	0.996478
YAL032C-U	TGATCCGCGTCGATGCTCTT	0.985263
YAL033W-U	CTGACTTAGTGCATACTGCT	0.784575
YAL034C-B-U-C	ATTGGTCACTCTGCACTGCT	0.947375
YAL034C-U	ATGAGCGTCCTACGACTGCT	0.988991
YAL034W-A-U	GGACCTCTGCTCATTATGCT	0.961752
YAL035C-A-U	ATTGGTAACTCTGCACTGCT	0.94724
YAL035W-U	ACTAGCACGGCTGAGCAGAT	0.0274396
YAL036C-U	CCTATGCACTGATTCCAGAT	0.996531
YAL037W-U	AGCGCGACGTTGATCCAGAT	0.978506
YAL038W-U	ATTGAGAGTCAGTGCCAGAT	0.920139
YAL039C-U	TATATGCGATCACCGCCGTG	0.986254
YAL040C-U	ATTGTCACCTCAGAGCCGTG	0.967311
YAL041W-U	TATGGACTGGCATCACCGTG	0.992019
YAL042C-A-U-C	TCATTGATGCCAGGTACGTG	0.659451
YAL042W-U	CTTCACGTCAGATGAGTTGG	0.963258
YAL043C-U	AGTCCATGCAGCACTCTTGG	0.0300059
YAL044C-U	ATCAGGTCACGCAGTATTGG	0.989427
YAL045C-U	ATGACGTGAGCACCTATTGG	0.996398
YAL046C-U	GATATGATGTAATCCTGCCG	0.984661
YAL047C-D	TCCTTTGGCAGAGTGACCTG	0.0976949
YAL047C-U	GTCCGACGTTAGATCACCTG	0.109642
YAL048C-U	AAAGCAGACTCATCATGCCG	0.980556
YAL049C-U	CGTATAGCTCGATATGGCCG	0.870765
YAL051W-U	GATGACAGTACAGTTGACAG	0.996604
YAL053W-U-N	TAGAGCAGACGCATTGACAT	0.981127
YAL054C-D	CCACCTTGTAGGCAGAGATG	0.974592
YAL054C-U-N	GCTACAAACATAAGTGCGGG	0.976928
YAL055W-U	TCCATTGACAGAGATGACAG	0.9806
YAL056C-A-D-C	GACGTAGATCCAGTTACCTG	0.950449
YAL056C-A-U-C	CAGCTAGTATCAGCGACCTG	0.941518
YAL056C-A-U-C-N	CAGCTAGTATCAGCGACCTC	0.93603
YAL056W-U	TAAGATGTGTGAACTGCGTC	0.888355
YAL058W-U-N	CAAAGATACCATAGGCGTCT	0.983501
YAL059W-U	ATATGATGAGCACCCGCGTC	0.947373
YAL060W-U	CCAGGTAGTGAACTGCTATC	0.985583
YAL061W-U	CGCCTGACTATAATGCTATC	0.987087
YAL062W-U	CAGTATTGGGAATCGCTATC	0.997315
YAL064C-A-D	ACACGATGATAAGCCAGCGC	0.981287
YAL064C-A-U	CCTGATGAGTAATGCGATAG	0.991896
YAL065C-U	TATCTCTGAACAGCGTGGGC	0.972663
YAL066W-U	CTCATAGAGAAAGACTGGGC	0.994932
YAL067C-U	TAGCATCCGCGAATGTGTCC	0.986077
YAL068C-U	ACATTCTGTCAAGCGTGTCC	0.994116
YAR002C-A-D-N	AGATACAGGACATTCAGCGT	0.995279
YAR002C-A-U	CATGTAGGCTAATCGGATAG	0.99005
YAR002W-U	TATTGGCACACCTGCATGGC	0.695161
YAR003W-U	GGTATGCACTCACATCTATC	0.971399
YAR007C-U	GCAGTGCGTGAACCTCTATC	0.988477
YAR008W-U	CATGAGAGTGAAGCAGTATC	0.990637
YAR014C-U	CATCGAGTATAAGGATCGTC	0.946075
YAR015W-U	AGAGATCAGCCAGACTCGTC	0.911511
YAR018C-U	TAGTCACGGACATGCTCGTC	0.00857596
YAR019C-U	GCGCTTATCACATTTGACAG	0.013721
YAR020C-U	TTGCACCATACCAGATACAG	0.998218
YAR023C-U	GCACTCTACAGATGATACAG	0.988208
YAR027W-U	AGACTCACCTCGATATACAG	0.993863
YAR028W-U	ATCATGTCACCAGAGTGCCG	0.994704
YAR029W-U	GACCTATCATCATATTGCCG	0.978941
YAR030C-U	CAGTAGATGCCATAGATCCG	0.991709
YAR031W-U	TATGTATGTCCACTCATCCG	0.910281
YAR035W-U	TGACTCAGTAGCATCGTTGG	0.993895
YAR037W-U	AGCTAGACTATCGCCCAATG	NA
YAR040C-U	CCATCTCAGTGGGTGCAATG	NA
YAR042W-U	ATTCATGTGCCAGTGCCGTG	0.956995
YAR042W-U-S	ATTAGTCTGCCAGCTCCGTG	0.861064
YAR043C-U	ATTCTAGCGGCAGATCCGTG	NA
YAR047C-U	CTGATAGCGATACGTCCGTG	0.994414
YAR050W-D	TTCTACGATAGCGAGAGATG	0.97167
YAR050W-U-E	TAATCTTGGCGACGGGACGT	0.978661
YBL001C-D	AAGAGTAGTGAAGCGACCTC	0.964036
YBL001C-U	AACTGACAGGAAGGCGATCC	0.980424
YBL002W-D	AATTAAGGAGCATGGACCTC	0.993552
YBL002W-U	AAGGATCTTTCAACAGCTCC	0.993347
YBL003C-D	AGATGACGCTAACTTACCTC	0.97095
YBL003C-U	AATTTGTGCGAAGCCGCTCC	0.986203
YBL004W-D	AGTCACGATACAGTTACCTC	0.940184
YBL004W-U	AATGACGAGGAAGTTGCTCC	0.978337
YBL005W-D	ATATGGGTGGAAGCTCCCTC	0.992276
YBL005W-U	AAGGATGTCTAACACTCTCC	0.99296
YBL006C-D	AGACTACTTGAACGATCCTC	0.0120033
YBL006C-U	AAATGGGCTTCAAGATGTCC	0.13679
YBL007C-D	ACATAGCTTGAAGGGTCCTC	0.897328
YBL007C-U	AGATGTAGACCACCGTGTCC	0.915123
YBL008W-D-N	AGACTTAGTGAACGTCGCCT	0.794949
YBL008W-U	ACACCACATGAAGGGATTCC	0.498055
YBL009W-D-N	GACTGCGTGGAATTTCGCTC	0.994323
YBL009W-U	ATGAGGCGTCGAACTCTTCC	0.990855
YBL010C-D	ATTTACGCGAGACACGGCTC	0.766962
YBL010C-U	AGAGTACAGCACCTAGTTCC	0.98058
YBL011W-D-N	AGAGGTCATAACCCTGCTCT	0.983838
YBL011W-U	ATGACCACCGGAACTGAAGC	0.973157
YBL012C-D-N	ATGAAGCGGTCGGAATCTCT	0.972241
YBL012C-U	ATACCCACGGAAGTTGCAGC	0.9222
YBL013W-D	AAGACCGACTAACTGATCTC	0.7128
YBL013W-U	ACATTTAGGGAACGCAGAGC	0.799284
YBL014C-D	ATAGTACGACCAGGACTCTC	0.0188336
YBL014C-U	AACACGCAGTAATTCCGAGC	0.980763
YBL015W-D	AAGGATTAGTCACACCTCTC	0.989672
YBL015W-U	ACCCAGTAGTGAACAGGAGC	0.978935
YBL016W-D	AGTAACGTACCATGTCTCTC	0.401568
YBL016W-U	ATAATGCCGGTCAACGGAGC	0.0179507
YBL017C-D-N	AAGGATTCTGAAGTCCAGTT	0.982557
YBL017C-U	AACTACTATGAAGCGGGAGC	0.969917
YBL018C-D	AACTGTCCTGAAGAGTAGTC	0.726463
YBL018C-U	AACAGTTCCGAAGGCTGAGC	0.351631
YBL019W-D	ATGGAGACCCTAGACACGTC	0.994551
YBL019W-U	AATTTCCGCGAAGCGTGAGC	0.936264
YBL020W-D	AATATGTCTGAAGGGCCGTC	0.937799
YBL020W-U	AATAGCCTTCAACGTCTAGC	0.970581
YBL021C-D	AGGACATCTATAACTCCGTC	0.995772
YBL021C-U	ATAGTGACGGAACTGTTAGC	0.993099
YBL022C-D	ATAGCCGACTAACGAGCGTC	0.945515
YBL022C-U	ATCGAACGTGTGTCAAACGC	0.162214
YBL023C-D	AGACAGGTCGATAACTCGTC	0.938834
YBL023C-U	AAAGGAATCTGTCTCAACGC	0.980411
YBL024W-D	AGACTCGTATAACTCTCGTC	0.701858
YBL024W-U	AGGCACCATACATTTAACGC	0.734922
YBL025W-D	AAGAGCCTTGAAGCGTCGTC	0.0222975
YBL025W-U	AATTTCAGGGAATGGCACGC	0.0179982
YBL026W-D	AGCAGACTCCTTAATTCGTC	0.0175943
YBL026W-U	ACATCGAGGGAATACGACGC	0.662835
YBL027W-D	AAGCGAGTAGCACGTTCGTC	0.0265746
YBL027W-U-N	ATAGACACCGGAATGACGCT	0.912899
YBL028C-D	AACATCTTGTGAAGGAGGTC	0.354413
YBL028C-U	AGGTAATATACACTCACCGC	0.924014
YBL029W-D	AATCATCGGTGGCAACGGTC	0.985995
YBL029W-U	AGTAATATCTAAGCACCCGC	0.884482
YBL030C-D-N	AGATGATCCTAACTCCGGTC	0.0205488
YBL030C-U-N	ATTGTAGTGAACCGCCCGCT	0.707194
YBL031W-D	ACCCATTATACAGAGCGGTC	0.981828
YBL031W-U	AGATTAGTTCAAGCGCCCGC	0.946058
YBL032W-D	ATAGCGCGATAACGTCGGTC	0.968823
YBL032W-U	AATCATTCGGAAGGAGCCGC	0.95919
YBL033C-D-N	CTCGTATATCACCAGGTCGGTC	0.0180092
YBL033C-U	AATTATGTCGAACGCGCCGC	0.0333674
YBL034C-D	AACTTTGTGGAATGCTGGTC	0.953514
YBL034C-U	ATAGTATCGGAACTCGCCGC	0.96879
YBL035C-D	ACTCGATTGGAATAGTGGTC	0.944669
YBL035C-U	ATTCGATGGGAACGATCCGC	0.979542
YBL036C-D-N	ACGGACTCTACAGTTGTGTC	0.975611
YBL036C-U	AGAAGGTCATCGAACTCCGC	0.986467
YBL037W-D	AACTCTCGTGAATCGTTGTC	0.982069
YBL037W-U	ACATAACTTTCCAGAAGCGC	0.97545
YBL038W-D	AGTTATACCAGCCGACATTC	0.965276
YBL038W-U	AAGTAGACTGAACTCCGCGC	0.938883
YBL039C-D	AAGACTGTTGAACCGCATTC	0.806748
YBL039C-U	AATACTCTGGGAACAGGCGC	0.975369
YBL040C-D	ATAGCACCCTAACTGGATTC	0.831545
YBL040C-U	ATACTCTCGGAAGGTTGCGC	0.790479
YBL041W-D	AGTAGATCCCTCTGAACTTC	0.880415
YBL041W-U	AATCGCTTTCAACGGATCGC	0.865188
YBL042C-D	AGTTAGTCACCAGTCACTTC	0.983061
YBL042C-U	AAGATAGTCGCCGAACTCGC	0.923895
YBL043W-D	ACACGGCGATAAGTGGCTTC	0.990835
YBL043W-U	AAGAGTCATTAACACCTCGC	0.0145521
YBL044W-D	AATGATCCCTAAGGCTCTTC	0.983565
YBL044W-U	AATTGATGGGAAGTCCTCGC	0.905109
YBL045C-D	ATACGAGGCACAGGGTCTTC	0.994092
YBL045C-U	ATAAGTCGTAGGAATGTCGC	0.991074
YBL046W-D	ACCACTTATGTGAAGCGTTC	0.979939
YBL046W-U	ACAGCAAAGGAAGTTGTCGC	0.98223
YBL047C-D	AAGTCATGCTAACCTCGTTC	0.937093
YBL047C-U	ACGCGAATAGTGTTCAAGGC	0.64881
YBL048W-D	ACCATTGTCACATAGGGTTC	0.982517
YBL048W-U	ACAGTCATGGAAGTTAAGGC	0.995286
YBL049W-D	AGTTCAACAGTGCGTCCAAG	0.992712
YBL049W-U	AACGTATCGGAAGCATAGGC	0.995912
YBL050W-D	AAGCAACCACTTTCTGCAAG	0.942299
YBL050W-U	ACGTATAGCATAAGGTAGGC	0.970087
YBL051C-D	ACCTTTGAAGTGTGCAGAAG	0.394674
YBL051C-U	ATATGACCTGAACCGACGGC	0.618668
YBL052C-D	AGTCTTGAAGTCATCGGAAG	0.985028
YBL052C-U	AAATGCTCTTCAACTACGGC	0.992856
YBL053W-D	ATTACATACGCGCTGGGAAG	0.984106
YBL053W-U	ATACTTGCGGAAGCTACGGC	0.958325
YBL054W-D	ATCGTATAATCGGCGTGAAG	0.0162926
YBL054W-U	ACAGCGATGGAACTTACGGC	0.960278
YBL055C-D	AGCGCACCCATTCGGATAAG	0.962497
YBL055C-U	ATAATACGTCTGCAACCGGC	0.994093
YBL056W-D	AACATCCAGGTGCGGAACAG	0.99297
YBL056W-U	ATACTCACTGAAGGTCCGGC	0.993627
YBL057C-D-N	ATCGTAAGCCGACGTACAGT	0.995466
YBL057C-U	ACTAATCTTGAATTGGCGGC	0.972868
YBL058W-D	AGGTACTACATCCACTACAG	0.0668703
YBL058W-U-N	ACGAATACCGTAACATGCGGC	0.0437332
YBL059W-D	AACTGAGTCTAATGGACCAG	0.0154263
YBL059W-U	AATACGACTGAAGGATCGGC	0.992596
YBL060W-D	AATGCGACATCTTAACCCAG	0.984989
YBL060W-U	ATATCCTTGGAAGCCTGGGC	0.991542
YBL061C-D	AATACGAGCTAAGCGGCCAG	0.987666
YBL061C-U	ACACTTCCTGAACATTGGGC	0.954192
YBL062W-D	AATATGGCCTAATCCTCCAG	0.968835
YBL062W-U	AGCCTAAGCACACTTTGGGC	0.955566
YBL063W-D	ATGGTCATCTAACCTTCCAG	0.988654
YBL063W-U	ACATGATAACCCGTACTGGC	0.994429
YBL064C-D	AAAGTCGCAGTAATCCGCAG	0.997939
YBL064C-U	ATAGACCTGGAATCCGTGGC	0.972215
YBL065W-D	ATACGAGACCCAGTTCGCAG	0.970153
YBL065W-U	AATATACTTGAAGGCGTGGC	0.0196569
YBL066C-D	AGATTGCCCTAACCGTGCAG	0.0120043
YBL066C-U	AAGCTCGTCGAATAGTTGGC	0.996977
YBL067C-D	AATGCGACGTAACTTTGCAG	0.860307
YBL067C-U	AGTTAGCACCCACATTTGGC	0.584714
YBL068W-D	AGGAGACGTTGATAACTCAG	0.997175
YBL068W-U	AAGACGACGTAAGCCCATGC	0.992386
YBL069W-D	AGATTACTCTAACGCCTCAG	0.978739
YBL069W-U	ATAGTCCGGGAACTGTATGC	0.991755
YBL070C-D	AATAGCGCCTAAGGGCTCAG	0.960632
YBL070C-U	AAGGTACTGGAAGCTACTGC	0.980829
YBL071C-D	AATGTAACCGCATGGGTCAG	0.0128591
YBL071C-U	AATCTTACGGAATCGTCTGC	0.411006
YBL072C-D	ACCTGTAGAGTAAGTGTCAG	0.625006
YBL072C-U	AAGCGGACTGAACTTTCTGC	0.669629
YBL073W-D	ACAGGCTAACGAGTATTCAG	0.931723
YBL073W-U	AACACGTCGGAAGCTAGTGC	0.948533
YBL074C-D	ATCGTAGACCCAGGCTTCAG	0.943768
YBL074C-U	AACGACTTGGAACTGCGTGC	0.984999
YBL075C-D	AGGCTATACCCATTCTTCAG	0.976958
YBL075C-U	ACAGTTTAGGAAGCTCGTGC	0.965024
YBL076C-D	ATTTCAGGACCACGCCAGAG	0.016287
YBL076C-U	ATATAGGCCGCGAACCTTGC	0.0222925
YBL077W-D	ATAGCCGACGTACCAGAGAG	0.314168
YBL077W-U	AACGCAGGTGAACTCCTTGC	0.0197177
YBL078C-D	ACATTGACGTAATCGGAGAG	0.984137
YBL078C-U	AACTAGCGGGAAGCTCTTGC	0.988319
YBL079W-D	AATCAGCCGTAACGTGAGAG	0.87373
YBL079W-U	ATCGAGCACGTAACCGTTGC	0.735296
YBL080C-D	AATACTCGCTAAGGTGAGAG	0.993025
YBL080C-U-N	AGAACGAAGCGGCTCAATCT	0.96126
YBL081W-D	ATATCGGCACCAGGTACGAG	0.9538
YBL081W-U	ATATCGAAGGGTGGTCAATC	0.513521
YBL082C-D	AGATCACTGTAACCGCCGAG	0.995152
YBL082C-U	ACACGACCAGGGATGGAATC	0.995844
YBL083C-D-E	AATTATGGCTAAGCGTCGAT	0.993673
YBL083C-U	ATAAGGCGCTGGAACCCATC	0.997912
YBL084C-D	AACTGATGCTAACGTAGGAG	0.812046
YBL084C-U	AATATGGGCTAACCCTCATC	0.959757
YBL085W-D	AATGAGTCCTAATCTGGGAG	0.850385
YBL085W-U	AAATCGAAGGCACGTTCATC	0.963482
YBL086C-D	ACCATATCGTTGAAGTGGAG	0.997847
YBL086C-U	ACCACTCACTAAGGAGGATC	0.997813
YBL087C-D	ACCGACTCGTAAGCGATGAG	0.253928
YBL087C-U	ACGAGTACGATAACTGGATC	0.930592
YBL088C-D	AATCGACGCTAACGACTGAG	0.997038
YBL088C-U-N	AAGCAGTGGGACGTCTTATC	0.667812
YBL089W-D	AACTGTCGCTAACGTGTGAG	0.989023
YBL089W-U	AGGTACTGCACACTTAACTC	0.959794
YBL090W-D	ACCGCGCTCTAATACTTGAG	0.982778
YBL090W-U	AAAGGTCTCTGAACTCACTC	0.960456
YBL091C-A-D	ATTGTAACGCACGCGCTTGC	0.994823
YBL091C-A-U	TCATAGTACGCATGTCGAGG	0.995416
YBL091C-D	ATCTAAGCCTGCCGAACTAG	0.988927
YBL091C-U	AGACTCGGTGAACCTGACTC	0.99152
YBL092W-D	ACGCAGTCTGTGAACCCTAG	0.22522
YBL092W-U	ACAGGCGACTAATACTACTC	0.0205777
YBL093C-D	AGAGACTACCTACCAGCTAG	0.0145748
YBL093C-U	AATGCTCGGGAAGGCTACTC	0.0120069
YBL094C-D	ACATTGGAGTAACGTGCTAG	0.308602
YBL094C-U	AAGATACGTCCAGCTTACTC	0.205333
YBL095W-D	ATCCTCGATGGTAATGTAGG	0.674144
YBL095W-U-N	TAATGGGAGCCACCCTCTAG	0.965703
YBL096C-D	AAGACACCAGCCACTGTAGG	0.994588
YBL096C-U	AAGCTGGCCTAATGGTCTAG	0.983138
YBL097W-D	AAGTGCCATTAAGCTGTAGG	0.948839
YBL097W-U	AGCATGGCGTAACTTTCTAG	0.962628
YBL098W-D	ACTTCAGCTACAGCGTTAGG	0.994779
YBL098W-U	AGTACAGACTCACCCAGTAG	0.986961
YBL099W-D	ATTGTAGCCGACTCACACGG	0.975092
YBL099W-U	AAGTGCGCCTAATCGCGTAG	0.976127
YBL100C-D-E	ATATCTATCGCCCGGACGAT	0.811221
YBL100C-U	ACTCTAGTGGACATAGGTAG	0.877537
YBL101C-D	AGTGATCTACTCCCATACGG	0.905844
YBL101C-U	ATCACGCCACGATAGGGTAG	0.483389
YBL102W-D-E	ATATTACTCACGACCCGGAT	0.993815
YBL102W-U	AATGTCGCGTAATGGCTTAG	0.982915
YBL103C-D	ATTCATCGGACACTTGCCGG	0.532005
YBL103C-U	AGTCTACCCACATGCTTTAG	0.894663
YBL104C-D	AATTCTAGCGCATGGTCCGG	0.971821
YBL104C-U	ACTCATCAGGTATGGGAACG	0.882023
YBL105C-D	ACACTACCTAGATGGAGCGG	0.216379
YBL105C-U	AGTGCTAATACGGCATAACG	0.979027
YBL106C-D	ACCTTATGTGTAATGAGCGG	0.971848
YBL106C-U	AGACCTCAGCTTCAGTAACG	0.986123
YBL107C-D	ACTTTCCTAGCAGTGAGCGG	0.995577
YBL107C-U	ATTGATGACCGACCGACACG	0.99644
YBR001C-D	ACTGATTTCTAATGGCGCGG	0.993
YBR001C-U	ATAGCTCATTAACCGGCACG	0.993689
YBR002C-D	AATTATCGCTCACACGGCGG	0.911571
YBR002C-U	AACTCAACCTCATGTAGACG	0.816266
YBR003W-D	AATCCATCGTCACGTTGCGG	0.022285
YBR003W-U	ACTAAGTAGCCATGACGACG	0.991805
YBR004C-D	ACTTTCGCACGACTGATCGG	0.941992
YBR004C-U	ACACACGATGGCTAAGGACG	0.983046
YBR005W-D	ACGATGTACGCATACCTCGG	0.0145745
YBR005W-U	ATATTCGAGCCCATCGGACG	0.976751
YBR006W-D	AGAACAAGACCATCGCTCGG	0.975024
YBR006W-U	ACCACTTCGCTTGAATGACG	0.991399
YBR007C-D	ATACATGGCCCAGTTCTCGG	0.993605
YBR007C-U	ATCATGTAGGTAACGTGACG	0.989382
YBR008C-D	AATTGTATAGCAGTCGTCGG	0.994164
YBR008C-U	AATTCGCACGCAGGTTGACG	0.988386
YBR009C-D	ATACTCTAGGGATATGTCGG	0.973855
YBR009C-U	ATGTCAGAGACGGTACTACG	0.9774
YBR010W-D-N	AAGATTCGATGACACTTCGT	0.9823
YBR010W-U-N	AGGCAGATACGATTAGTCGT	0.981713
YBR011C-D	ACGCCAGATTGCATTAAGGG	0.927475
YBR011C-U	AGACCGCATCCATTGGTACG	0.978986
YBR012C-D	ACCTATATTGTGAGACAGGG	0.778
YBR012C-U	ATCAGGTCTGGAAGATTACG	0.959167
YBR013C-D	ACTACCATCGCAGTTGAGGG	0.990178
YBR013C-U	ATCGAGATCCGAGTACACCG	0.986143
YBR014C-D	ATCACTTATCGCAGGTAGGG	0.984199
YBR014C-U	AGACTATCTCTAATGACCCG	0.981811
YBR015C-D	ATCTCGCACGCACTTTAGGG	0.800653
YBR015C-U-N	ATATCTGTTGAGCGGCCCGT	0.960188
YBR016W-D	AATCCGAGATCATCGACGGG	0.0350208
YBR016W-U	ACAGGTGAGTAATCTGCCCG	0.953161
YBR017C-D	AAGTCTATATCAGTAGCGGG	0.0137217
YBR017C-U	ATGATCTCTTAACCGAGCCG	0.0171516
YBR018C-D	ATATGACCTACGCCATCGGG	0.987796
YBR018C-U	AACCGACTAGCAGATAGCCG	0.978866
YBR019C-D	ACTCATTCGAGATGTTCGGG	0.906908
YBR019C-U	ATTATAGTGCCAGACCGCCG	0.0337907
YBR020W-D1	ACTCTCACGGAGGCTAATGG	0.981797
YBR020W-D2	TTTGCTCCAGTCCGCATGTG	0.992003
YBR020W-U1	ATAGAAGTATAAGTGCGCCG	0.993094
YBR020W-U2	TATCCCTACGGCATTGCGTG	0.992899
YBR021W-D	AAATCCACGGTGACGCATGG	0.913159
YBR021W-U	AAGCATCGTTAAGGCTGCCG	0.835505
YBR022W-D	ACTCGTGTGTAATCCGATGG	0.987701
YBR022W-U	AAGGCAGACTACTCGATCCG	0.974635
YBR023C-D	ATACGGTGAGCATACCCTGG	0.944488
YBR023C-U	AGATCGTTATACACTCTCCG	0.24287
YBR024W-D	ACCTGTAGTGTAATAGCTGG	0.0188522
YBR024W-U-N	ATAGATGACTACCGCGTCGT	0.983782
YBR025C-D	AATTGACCGGCATTCGCTGG	0.947856
YBR025C-U	ATACGTTAGACAGGTCAGCG	0.986397
YBR026C-D	ACCGAGTTTATCACATCTGG	0.96368
YBR026C-U	ACTTTAATAGCAGTGGAGCG	0.029127
YBR027C-D	ACCTCAGTAGGACTCAGTGG	0.993605
YBR027C-U	ATCCTGATTTAAGGTGAGCG	0.99533
YBR028C-D	ACATACTTTGCAGGTAGTGG	0.982599
YBR028C-U	AAGCTCCTGTAACTCTAGCG	0.990634
YBR029C-D	AACTTTGAGGCATATCGTGG	0.947854
YBR029C-U	AAAGCGAACTCATGTTAGCG	0.978279
YBR030W-D	ATATACCTCTCAGGCGGTGG	0.0184568
YBR030W-U	ATGAGGACGTTACACACGCG	0.872587
YBR031W-D	ATTCGCCGCAGACTTCTTGG	0.989245
YBR031W-U	AAATTATGCGGCACCACGCG	0.972864
YBR032W-D	AATGGAACCGGCCTGACATG	0.995963
YBR032W-U	AATGTATCCTAATGGCCGCG	0.319535
YBR033W-D	AAAGGCCAGTGGATTACATG	0.979655
YBR033W-U-N	ACAGTATGGACAGTTCCGTG	0.98853
YBR034C-D	ATTAGGGTCCACTGCCCATG	0.0188211
YBR034C-U	AATCGACTGTAAGTATCGCG	0.967514
YBR035C-D	ACGACCGATTTATACGCATG	0.17336
YBR035C-U	AAGAGTGTCTAAGTCTCGCG	0.210803
YBR036C-D	ACAGTCCAGTGGTTAAGATG	0.904691
YBR036C-U	ATAGCCTTCTAAGAGCGGCG	0.0800673
YBR037C-D-E	ACCTTATACCGATAGCGATC	0.996106
YBR037C-U	AATTCTCTGTAAGCGCGGCG	0.992402
YBR038W-D	ACCTCCTAGAGAGTGGTATG	0.933698
YBR038W-U	ATATTCCTAGCACGAGGGCG	0.975555
YBR039W-D	ACCATGAGGCCAGGTTTATG	0.015437
YBR039W-U-N	AATCACTACTAGGAGGGCGT	0.0188659
YBR040W-D	ATCCGACGTTGCAGGAACTG	0.95763
YBR040W-U	ACATGCCTTGAATTAGGGCG	0.67396
YBR041W-D	AGTAGGATAGCCTCCCACTG	0.973606
YBR041W-U	AATTCGCTCTAAGCTGGGCG	0.985876
YBR042C-D	ATTAGTGCCGACCACGACTG	0.982974
YBR042C-U	AGCATTCTATTAACCCTGCG	0.0222895
YBR043C-D-N	ATTTGGTCCTCACGCGACTT	0.993911
YBR043C-U	AAGCTCTTCTAACGTCTGCG	0.995334
YBR044C-D-T	AACGGCACGGCATTTGACTT	0.915504
YBR044C-U	ATTTACTCCAGAGGCGTGCG	0.96485
YBR045C-D	ATCATAGCGGTGGTAACCTG	0.997856
YBR045C-U	AACTCTGTGTAACGTGTGCG	0.981802
YBR046C-D-N	AAGTACGGGTCATGGACCTT	0.991036
YBR046C-U	AGGCTACCTACACTTGTGCG	0.973834
YBR047W-D	AGGAGTATTCCATCACCCTG	0.981684
YBR047W-U	AATACGATGGGACATTTGCG	0.981879
YBR048W-D	AAGCTCTGTTAATGGCCCTG	0.911726
YBR048W-U	ATCGGCCTGTAATCGGATCG	0.170716
YBR049C-D	ATGATGGGTTCCACTCCCTG	0.016102
YBR049C-U	ATGAGAGCTTCCGAACCTCG	0.467331
YBR050C-D	ATTCGTCGTGACAGTCCCTG	0.996139
YBR050C-U	AATTAGCACTGACGGCCTCG	0.987076
YBR051W-D	AGAGTTTATGCACCCGCCTG	0.913935
YBR051W-U	AATGCTCGGTAAGCTCCTCG	0.910276
YBR052C-D	AATTTGGTAGCACGCGCCTG	0.910199
YBR052C-U	AATATACGATTACGCGCTCG	0.981647
YBR053C-D	ATATCTTATAGGAGGGCCTG	0.860007
YBR053C-U	ATTATTGTCCCAGGCGCTCG	0.952358
YBR054W-D	AGTGATACGGTCCCATCCTG	0.987382
YBR054W-U	AGACTCTCTTAACTGGCTCG	0.981319
YBR055C-D	ATATGGTTCGCCACGTCCTG	0.896832
YBR055C-U	ATCAGGAGTCGTAATAGTCG	0.980588
YBR056W-D	AACTTAGTATCAGGTGGCTG	0.996938
YBR056W-U	AGTTATACCGCATCACGTCG	0.99093
YBR057C-D	AGGACCGAGCCCTATATCTG	0.956233
YBR057C-U-T	ATCTCGGAGCCTAGGTCGTT	0.541206
YBR058C-D	ATTCTTGCACGACGGGTCTG	0.955094
YBR058C-U	ATAGAGTTGCCACCCTGTCG	0.6951
YBR059C-D	AATCAGACCGTAGGCCAGTG	0.739683
YBR059C-U	ACGTGACGAGCACTTTGTCG	0.964634
YBR060C-D	AGTTTCGAGAGACCTCAGTG	0.924109
YBR060C-U	AGACGGATATACGATCTTCG	0.964216
YBR061C-D-N	AACGAGCCTGCCATTAGTGT	0.98459
YBR061C-U	ACATCAGGTGTAAGTGTTCG	0.950367
YBR062C-D	ATATCCTAGTCAGGGCCGTG	0.994116
YBR062C-U	ATGCCAGAGTTTACTGAAGG	0.991683
YBR063C-D	AAGTCATAGGCACCTTCGTG	0.985431
YBR063C-U	AACTAGCACTGTTGTGAAGG	0.997122
YBR064W-D-N	ACTAGACGTATCAGTAGGTT	0.896375
YBR064W-U	ACTCACTCAGGTGGATAAGG	0.984419
YBR065C-D-N	ATATACCTCCGCAGTGGGTT	0.0162753
YBR065C-U	ACTATACGGCCAGATCCAGG	0.991241
YBR066C-D	ATTACCGCTCCAGTGTGGTG	0.989688
YBR066C-U	ACACTTCTACCATTGGCAGG	0.829674
YBR067C-D	ACGACTTTAGCATTGTGGTG	0.988676
YBR067C-U	ATATGCCCTACACGGTCAGG	0.995106
YBR068C-D	ACTTCTGACGGATATTGGTG	0.899093
YBR068C-U	ATCCCACGGAGATTCAGAGG	0.979145
YBR069C-D	ACCGTTACGAGATGTATGTG	0.698482
YBR069C-U	ATACACTTGCCACGGAGAGG	0.834945
YBR070C-D-E	ATACCACCTCAGTAGGTGAT	0.387543
YBR070C-U	AATCATTAGTCACGAGGAGG	0.852771
YBR071W-D-N	AACTGGTTAGCATCCGTGTT	0.99368
YBR071W-U	ATTACTCTACGCAGCGGAGG	0.991617
YBR072W-D	ACTTTACTCGCAGTCGTGTG	0.997024
YBR072W-U	AACGCATACTCAGTCGGAGG	0.985518
YBR073W-D	ACTACCGTATCATGGGTGTG	0.937898
YBR073W-U	ATATCCTATCCCACTGGAGG	0.974765
YBR074W-D	AGAGCACCACTCCGTAATTG	0.956484
YBR074W-D1-C	ACCACCGTGCCATTTGATTG	0.797489
YBR074W-D1-C-E	ACCACCGCCATTTGATTGAT	0.705185
YBR074W-D1-C-T	ACCACCGCCATTTGATTGTT	0.765578
YBR074W-D2-C	CGACTCGACTTAGATATGTG	0.0515576
YBR074W-D2-C-N	CGACCGACTTAGATATATGT	0.685863
YBR074W-U	AATCTACCGGCACGATGAGG	0.987291
YBR074W-U1-C	AATGACCCGTGACACTGAGG	0.977693
YBR074W-U2-C	TAGTGCGATCCATCCTCGTG	0.0958159
YBR076W-D	AGGCTCACCCTACTATATTG	0.961265
YBR076W-U	ATAGTCTACGCCACGCTAGG	0.0255758
YBR077C-D-N	ACGACCCTACCCATGTATTG	0.38105
YBR077C-U	ATCACTCTTACCAGGCTAGG	0.322961
YBR078W-D	ATATAGCGGACGCCACCTTG	0.814793
YBR078W-U	AGATCGACGAGATTTCTAGG	0.937987
YBR079C-D	AGAGAAGTTACATGCCCTTG	0.945114
YBR079C-U	ATCACTCGTACAGCGGTAGG	0.973972
YBR080C-D	ATAAGACCAGGCGGCAGACT	0.0205831
YBR080C-U	ATTATCGTCGCCAGGGCTTG	0.0205829
YBR081C-D	AGGCTTACGATCCTCAGACT	0.0659758
YBR081C-U	AGGATCACCTTCCATTCTTG	0.0334414
YBR082C-D	ATGCAACGAGCCGGTAGACT	0.795558
YBR082C-U	ATAGTTCCCGCAGCTCGTTG	0.56665
YBR083W-D	ACCTGAGTTAGAGGATGACT	0.984012
YBR083W-U	ATGCTACGGCCACTAGGTTG	0.992774
YBR084C-A-D	ATTGGTCAGCGAGCCCTACT	0.791333
YBR084C-A-U	ACACACTGTATAGAGGGTTG	0.809362
YBR084W-D	ATTATGCGCGGCACGGTACT	0.976613
YBR084W-U	ACACTCTAGTCAGGTGGTTG	0.978523
YBR085W-D-E	ATGGTCCGATGATCACCTAT	0.0145399
YBR085W-U	ACAGCTATTAGGACGTGTTG	0.110894
YBR086C-D	AAGGCGATTGCACGTCACCT	0.018008
YBR086C-U	ACAACGTCATGGACACTTTG	0.0120064
YBR087W-D-T	ATTTGTGCAGCCGACCTTTT	0.926841
YBR087W-U	ACCGAGCGTATCGCACTTTG	0.97713
YBR088C-D	GCTATTAGACGATGGTTCTG	0.936293
YBR088C-U	ATTGCAGCCGAGATCGTCTG	0.983339
YBR089C-A-D-C	ATCGTCAGCGTAGAGACCCT	0.989802
YBR089C-A-U-C	AGCTCAAGAAGCACGGTTTG	0.98921
YBR089W-D-N	AAGCCGATGTCATCTACCTT	0.0759495
YBR089W-U	AGACTGTTACGCATCCTTTG	0.0693295
YBR090C-D	AGTCATACTCCACTGTTCTG	0.985068
YBR090C-U	TATACGGTCATCATGGTCTG	0.982523
YBR091C-D	ATGGGAGCGTCATCTACCCT	0.389755
YBR091C-DX	ATGGGAGCGTCATCTACCCT	0.337285
YBR091C-U	AGCACGAGGTAGCCGCAAAT	0.837796
YBR091C-UX	AGCACGAGGTAGCCGCAAAT	0.830318
YBR092C-D	AATGAGTGGTCACCTGCCCT	0.987667
YBR092C-U	AGCCTAGAGGTCTGTGAAAT	0.98392
YBR093C-D	AAGTATGGTGCCTCATCCCT	0.0214387
YBR093C-U	ACGATGCACCTTCGCTAAAT	0.0137113
YBR094W-D	AGTTTAAGTGCAGTGAGCCT	0.0145757
YBR094W-U-N	AGCCTAGACCTGTTCGCAAT	0.0128632
YBR095C-D	ATGAGACGGCTAGTACGCCT	0.734835
YBR095C-U	AACATACGAGGCGGTGCAAT	0.648419
YBR096W-D	ATTGAGCTTCGAGACCGCCT	0.519974
YBR096W-U	AAACGAGCAGGTGTGTCAAT	0.010275
YBR097W-D	AATTAGTTCTCATGCCGCCT	0.0710659
YBR097W-U	ATTGTGAGGCACCGCCGAAT	0.0248639
YBR098W-D-N	ATATACTGTGGCACGGGTCT	0.716654
YBR098W-U1	ATTGCTAGACGCCCGCGAAT	0.987989
YBR099C-D	ATACTTGTCGCAGTGGGCCT	0.989091
YBR099C-U	AAATCCTCAGGTGCGCGAAT	0.988501
YBR101C-D-N	AGGTGGTTCTCACTCATCTT	0.32073
YBR101C-U	ACTATACGAGGTGGCTGAAT	0.12778
YBR102C-D	AACCGTTGCTGCATTATCCT	0.92869
YBR102C-U	ACGCGACGACTTCTCTGAAT	0.985283
YBR103W-D	AATTGTCTGGCAGGCGTCCT	0.985968
YBR103W-U	ACTAGCGCAGTGTAGGTAAT	0.10718
YBR104W-D	ACGGCGATGATATAGGTCCT	0.982586
YBR104W-U	AGCTACAGGTTCGCTAACAT	0.989675
YBR105C-D	ATTCCGAGTGCCCTGAAGCT	0.981322
YBR105C-U	AGCTCGACGTTCGGACACAT	0.992351
YBR106W-D	AAAGGCATTGTCGCTAAGCT	0.406273
YBR106W-U	AAGGAGCACTGGTTACACAT	0.361533
YBR107C-D	ATTAGTACGCGCCGACAGCT	0.968729
YBR107C-U	AGGGACTCATTAGCCGACAT	0.984757
YBR108W-D	AGATTTACGTCATCCCAGCT	0.983455
YBR108W-U	ACTTCTGCCACGGGTGACAT	0.18666
YBR109C-D-T	TCACTCCGATCGTTTTTTTT	0.0101812
YBR109C-U	ATTGGGCTACCGCGCTACAT	0.945056
YBR110W-D	ACCCTTGTGACGATGGAGCT	0.927055
YBR110W-U	AAATTGCCAGGCCGAGCCAT	0.98527
YBR111C-D	ATCCGAGTGGTCCAGTAGCT	0.852053
YBR111C-U	AGGCAGGTCTTACACTCCAT	0.260069
YBR112C-D	AGCAGGTTAGGCACTTAGCT	0.181163
YBR112C-U	AGGAGGCCCTGCATTTCCAT	0.127914
YBR113W-D	AATGCGGATTCAGGTTAGCT	0.991428
YBR113W-U-N	AATGAACGGTCACCCAGCAT	0.98365
YBR114W-D	AATGATACCTCAGTACCGCT	0.987935
YBR114W-U	ATAGATTCGGCCACCGGCAT	0.989045
YBR115C-D	ATTTAGTTGGCAGCCGCGCT	0.993745
YBR115C-U	ATTCGACTACGACCTGGCAT	0.985313
YBR116C-D	AATGTCAGTTCACCGGCGCT	0.991629
YBR116C-U	AGCTAGACCGTCGGACTCAT	0.994454
YBR117C-D	AAGTAGTAGTCAGGCTCGCT	0.0188581
YBR117C-U	AAACGCTCAGGTAGAGTCAT	0.0137212
YBR118W-D	AATTCACGAGGCGTCAGGCT	0.036868
YBR118W-U	AGTAGTACAGCCCGCGTCAT	0.0120066
YBR119W-D	AAATCTCATTGGAGGAGGCT	0.989668
YBR119W-U-N	AGCCTTACCGACTTGTCATT	0.980804
YBR120C-D	ATTCGATCTTCACGACGGCT	0.989458
YBR120C-U	ATCGAGGGACGAGTCTTCAT	0.992722
YBR121C-D1-T	AGGAGATCGATTTTTTTTTT	0.0128121
YBR121C-D2	CCTGAGTACGCAGTGTTCTG	0.933156
YBR121C-U1	AGGATCGCGTAGACGTTCAT	0.0196084
YBR121C-U2	GGCAGGTGTTTCAAATTCTG	0.964023
YBR122C-D	ACTATTTGAGTCAGTGGGCT	0.0128642
YBR122C-U	ATCGTAGGCGCACGGTTCAT	0.0145787
YBR123C-D	AACTGGATTGCATTTGGGCT	0.754282
YBR123C-U	AACCACGTCGGATCAGAGAT	0.920508
YBR124W-D	ATACTTATCGGGAGCTGGCT	0.938651
YBR124W-U	ACTTAGCGAGGATCGTAGAT	0.951145
YBR125C-D	AGCCACGTCTTACATTTCTG	0.994181
YBR125C-U	GCAAACGGGTTGTAATTCTG	0.987083
YBR126C-D	ACTTGAGGCGTAGACCTGCT	0.692875
YBR126C-U	ATTCGAGCGGTAGCCACGAT	0.243442
YBR127C-D	ACTTTCGTAGGATGAGTGCT	0.0844211
YBR127C-U	ATTCTGAGGGCGACACCGAT	0.489316
YBR128C-D	AACGTGGGATCACTCGTGCT	0.99031
YBR128C-U	ATATCCGTAGGCACGCCGAT	0.96863
YBR129C-D	ATTAGCCTCGACACGGTGCT	0.861144
YBR129C-U	AATTGTGCCTCACCGGCGAT	0.974739
YBR130C-D	ATCACCTTCGGACGATTGCT	0.99726
YBR130C-U	ATCTTGCGAGGACCGTCGAT	0.989774
YBR131W-D	AACGTGTAGTCAGTGTTGCT	0.9834
YBR131W-U-N	TACACCGTCGCATTTCGATT	0.177686
YBR132C-D	AGGGAGGTCTCTCACCATCT	0.54629
YBR132C-U	ACTCTGAGCGGATACCGGAT	0.631809
YBR133C-D	AAACCTCGCGTCATTGATCT	0.0960285
YBR133C-U	ATACTACCTGCGAGGCGGAT	0.125054
YBR134W-D	AGCGAGTCCTCACTTTATCT	0.987407
YBR134W-U	ACGCTACTGAGACTCGGGAT	0.987955
YBR135W-D	ATTGGATGGCGACCTCCTCT	0.934459
YBR135W-U-T	AAGCTCGCATTCGGGATTTT	0.985964
YBR136W-D	AAGTGTCCGTCATGTCCTCT	0.935244
YBR136W-U	ACTTTCCTGAGATGTGGGAT	0.976378
YBR137W-D	AGCGACGGTCTCATTTCTCT	0.867615
YBR137W-U-N	AAGTAGCCTTCCCATTGGAT	0.988156
YBR138C-D	ACTGACCGTCTAGCGAGTCT	0.993002
YBR138C-U	AGGCTTCACGCACCTTGGAT	0.960352
YBR139W-D	ACGAGAGGCGTATCACGTCT	0.994856
YBR139W-U-E	TGTACTCATGTTGGATCGTA	0.859356
YBR140C-D	ATGAGCGCCCGATTACGTCT	0.940901
YBR140C-U	AATGTTCCATCCGGCCTGAT	0.97315
YBR141C-D	ACCGATGCGTCATTTCGTCT	0.987953
YBR141C-U	ACCTGGTAGGCAGTCCTGAT	0.991774
YBR142W-D	ACTTAGTGTGCAGTAGGTCT	0.943873
YBR142W-U	ATTATCGGCCCACGGCTGAT	0.974112
YBR143C-D	ACTCGACGCTCATTAGGTCT	0.932383
YBR143C-U	AAATACGCGGTCGCAGTGAT	0.964144
YBR144C-D	ATAGGATTATCAGCCGGTCT	0.965422
YBR144C-U	AACTTTGCGGCAGTAGTGAT	0.0409211
YBR145W-D	ACAACAAGCAGAGCGGGTCT	0.996237
YBR145W-U	ACCTGTAGACTATGGGTGAT	0.995436
YBR146W-D	ACCTATGCGGGATATGGTCT	0.631089
YBR146W-U	ACGTACTCCTCAGTCTTGAT	0.529485
YBR147W-D	ACGACCGTTGCATTGATTCT	0.994217
YBR147W-U	ACGAACGTGGCATGTTTGAT	0.975846
YBR148W-D	ACAGCGGTCTCACTTATTCT	0.980565
YBR148W-U	AGGTGCTCACTACCCGATAT	0.993653
YBR149W-D	ATGGAGAGCCCGTCACTTCT	0.996064
YBR149W-U	AGACGGACGCGATCCTATAT	0.0137187
YBR150C-D	AAAGATGAGGGCAGCCTTCT	0.99614
YBR150C-U	ACTGGACGACTAGGCTATAT	0.111326
YBR151W-D	AAGTCGTTCGCAGCTCTTCT	0.989963
YBR151W-U	ACGTCTCACGGATCGTATAT	0.994989
YBR152W-D-N	GGTTCACCATGCCTAGTCTT	0.0128642
YBR152W-U	AGCGTTGCTACACGGTATAT	0.98898
YBR153W-D	AACTGTGGATCAGCGGTTCT	0.944161
YBR153W-U	ACCCGGAGTGCATGGTATAT	0.976924
YBR154C-D	ACTACGCTGTCACGATTTCT	0.0307229
YBR154C-U	AGGATTCCAGCTACACCTAT	0.97213
YBR155W-D	AATCGCGTGGCAGCCTTTCT	0.961669
YBR155W-U	AATGGCGTCGCACGTCCTAT	0.97155
YBR156C-D	AGCCGTTCACGATGCTTTCT	0.986603
YBR156C-U	ATACGGAGTCGAGTCGCTAT	0.0162606
YBR157C-D	ACTAGCGGATGAGAGTTTCT	0.985667
YBR157C-U	AAAGCGACAGGCCGCAGTAT	0.989257
YBR158W-D	AGATCCTCAGGCCGCTAAGT	0.991088
YBR158W-U	AGGCTCAGCGTACCTAGTAT	0.942191
YBR159W-D	ATCTCTCATGGTGGGTAAGT	0.970186
YBR159W-U-T	TCGAACGGCAGCCGTACTTT	0.422273
YBR160W-D	AATCCTACGTGCGAGAGAGT	0.94224
YBR160W-U	ATTCAGTCGGCACGGCGTAT	0.991624
YBR161W-D	ATCCCTATGTGACGGAGAGT	0.990518
YBR161W-U	AGGCGCTTAGTAGATCGTAT	0.992661
YBR162C-D	ATTCCTCTGGCACGTCGAGT	0.997263
YBR162C-U	AGAGCCTCCTCATTTCGTAT	0.0222967
YBR162W-A-D	AATCATCCCTGGAGCGGAGT	0.991432
YBR162W-A-U	AATGCACGGGCACCCTGTAT	0.989283
YBR163W-D-N	ACTATCTATCGACGGGAGTT	0.287915
YBR163W-U	ACCGTCCTATCATCGTGTAT	0.172106
YBR164C-D	AACCTATTGTGCATGGGAGT	0.773125
YBR164C-U	AATTCGATGGCAGCGGTTAT	0.795807
YBR165W-D-N	ATTGTACTTGGCACTGGAGT	0.99131
YBR165W-U	ACGCTCGTATCACTGGTTAT	0.975111
YBR166C-D	ACCTCTCGGATAGCTGGAGT	0.915911
YBR166C-U	ACGCCGAGGTGCATTGTTAT	0.780094
YBR167C-D	ATGCGTACCCTCGACTGAGT	0.881876
YBR167C-U	ACCTGTGGCAGATGGTTTAT	0.949074
YBR168W-D-N	ACTGTCACCGGAGTTGAGTT	0.147971
YBR168W-U	ATGCCACCGTTGTCATAACT	0.162892
YBR169C-D	AAGATGCAACCCGCGCTAGT	0.958851
YBR169C-U	AATGCAACTCGCGGGACACT	0.969486
YBR170C-D-T	CTGCCAGGTAGATTTTTTTT	0.0136903
YBR170C-U	ACTCCCGATGTATTGACACT	0.739415
YBR171W-D	ATACAGGTTGCACTGGTAGT	0.951975
YBR171W-U	ATTGTGCATCCGGGACCACT	0.957365
YBR172C-D	AATCGGCGCTCACGCTTAGT	0.853535
YBR172C-U	AGAGCTTAGCCGATACCACT	0.983145
YBR173C-D	ACCGCTCGGATGATATTCTT	0.642884
YBR173C-U	AGCGCGGCGTCATCTTTAGT	0.97871
YBR174C-D	ACCTGACGCTGGATCTTCTT	0.90031
YBR174C-U	ACTGACTGTGCAGGTTTAGT	0.674747
YBR175W-D	ATGGTAGCTCGCCCACAGTT	0.968484
YBR175W-U	AGTGCCATCGTATTCCACGT	0.94616
YBR176W-D-T	ACGATGCCGATCGAGTTTTT	0.513203
YBR176W-U	ATATCTATCTGGAGGGACGT	0.994206
YBR177C-D	ATATTCGCGTCGAGTGAGTT	0.979151
YBR177C-U	ATACTTGGGTGCAGCTACGT	0.963072
YBR178W-D-N	ATTCTGAGATAGCGACGTTT	0.128364
YBR178W-U	AGCTAGTTGTACTCAGCCGT	0.464314
YBR179C-D	AGATTCGACTGATGCCCGTT	0.938295
YBR179C-U	ATGGTTGCTTCACCTGCCGT	0.828438
YBR180W-D	ACGGCGCTTCTTGCATCGTT	0.997078
YBR180W-U	AGAGATCGGGCTATATCCGT	0.988374
YBR181C-D	AGCCGTATTGTCAGATCGTT	0.908777
YBR181C-U	ATGGTGTCTCTCACGTCCGT	0.790394
YBR182C-D	ACGGCGCTTGTCATCTCGTT	0.0111486
YBR182C-U	AGTATTCGGCTCCACAGCGT	0.997122
YBR183W-D	AGCATCTGGCGATTCCGGTT	0.979195
YBR183W-U	ATATTATCGGTGACGAGCGT	0.988061
YBR184W-D	AGGCCCGTGCTCTTCATGTT	0.991523
YBR184W-U	ATATTGTCTGACCGCCGCGT	0.994868
YBR185C-D	ACCGTGCTGGTCATCGTGTT	0.988903
YBR185C-U	ATTAGGCTTGCAGTCCGCGT	0.995279
YBR186W-D	ATAGCCGTCGGATCTGTGTT	0.994573
YBR186W-U	AATCGGACCTGATATGGCGT	0.95822
YBR187W-D	ACGCCTATGCTACGTGTGTT	0.989936
YBR187W-U	AAGTCCTCGTCACTGTGCGT	0.0239797
YBR188C-D	ATGCGACCTTGTGGCAATTT	0.99016
YBR188C-U	AACTGGTTCGCATGTATCGT	0.995585
YBR189W-D1	ATTCCACTTCGAGGAGGCTG	0.0497287
YBR189W-D2	AGCGATAGTGGTGTCCATTT	0.0145768
YBR189W-U1	AGCGAGCTGTTTAAGCCCTG	0.508019
YBR189W-U2	ATGAGACCTGTTCACCTCGT	0.274115
YBR190W-D	AGTACGCGGTGAGATCATTT	0.0188642
YBR190W-U-N	TACTGCTATTCATCCGTCGT	0.00107121
YBR191W-D1	AGCAGGTTGGTCCATGATTT	0.0222871
YBR191W-D2	CTACGACTAGGAGATAGATG	0.219334
YBR191W-U1	ATATCTCGCGTCGGACAGGT	0.0334401
YBR191W-U2	TACGAGTACACAGGTATGGC	0.284461
YBR192W-D	ACGCTACCGCTGATCTATTT	0.887435
YBR192W-U	ATGCCGACGGTATCTCAGGT	0.970343
YBR193C-D	AGGCGCTGCGTATAGTATTT	0.915167
YBR193C-U	AGACTGTCGTCAGATCCGGT	0.922233
YBR194W-D	ATCTCTGAGTGAGGGACTTT	0.973625
YBR194W-U	ATCTATGACGTAGTAGCGGT	0.0154301
YBR195C-D	AAGCTGCGATGCCGTACTTT	0.989113
YBR195C-U	ATATACTTCCTCATCGCGGT	0.0111475
YBR196C-D	ATGCGCTGTCGAGGTACTTT	0.942744
YBR196C-U	ATCTCATTTGCGACGGCGGT	0.975502
YBR197C-D	AGCGCGTCTGCGATTCCTTT	0.0299936
YBR197C-U	ATTCCTATGCCGATGGCGGT	0.962573
YBR198C-D	ATGCTCACGGTCCGCAGTTT	0.0102911
YBR198C-U	ACCTTCTAGTGAGCTGCGGT	0.00943302
YBR199W-D	ACTGAGTGATGACCTGGTTT	0.994652
YBR199W-U	ACACTTCTCTCAGTTGCGGT	0.995508
YBR200W-D	ACGACTCTGGGATGATGTTT	0.508535
YBR200W-U	AATGTGCCTTCAGCCTCGGT	0.18695
YBR201W-D	AAGCCTCGCTGAGTATGTTT	0.997132
YBR201W-U	ACGCATCTACGACTGTGGGT	0.0180043
YBR202W-D	CCTCGCTCCAAATTGAGAAA	0.359685
YBR202W-U	AACTCGTTGGCATAGCTGGT	0.34687
YBR203W-D	CCTTCGCGCAAAGTATGAAA	0.965625
YBR203W-U-N	AACTTGCTATGAGGTCTGTT	0.992849
YBR204C-D	CCGCGTCGCAAAGAGTGAAA	0.980081
YBR204C-U	AAGGATCGTGTCATTCTGGT	0.969253
YBR205W-D	CGTTCTCGCAAAGCACTAAA	0.977301
YBR205W-U	ACTACTGTGGTCCATGTGGT	0.992555
YBR206W-D	CCGGCTGGCAAATGAGTAAA	0.968101
YBR206W-U	ACTACTGGCTTAGATGTGGT	0.980208
YBR207W-D	CCGCTCTGCAAAGACTTAAA	0.960574
YBR207W-U	ACCCATCTCGTCATTGTGGT	0.979391
YBR208C-D	CCTGGTGGCAAAGGCAACAA	0.98427
YBR208C-U	AGATCGAGGTTTAGCCATGT	0.988073
YBR209W-D	CCCAAGGGCAAATTGTGCAA	0.882894
YBR209W-U	ATGTCCCGACGCCTAGATGT	0.492957
YBR210W-D	CCCTGAAGCAAACTGGTCAA	0.994677
YBR210W-U	ATCAATCCGGCGGTAGATGT	0.992797
YBR211C-D	CCGCGATTCAAACGATTCAA	0.0179958
YBR211C-U	ACTTCTGGAGTATCGGATGT	0.0316967
YBR212W-D	CCTTGGCCGAAATGACAGAA	0.97591
YBR212W-U	AGTCCCGGTCTCCATGATGT	0.957806
YBR213W-D	CCTCTGGCGAAATAGGAGAA	0.883716
YBR213W-U-E	ATACGCCCTGAGACTGTCGT	0.97619
YBR214W-D	CCTATCCGCAAAGTGGAGAA	0.957376
YBR214W-U	AAGCTAGGGTCATTTGCTGT	0.988448
YBR215W-D	CCGTGGCAGAAACTTGAGAA	0.8163
YBR215W-U	ATTCATCCGGGCGAGTCTGT	0.831368
YBR216C-D	CGCCCGTGCTAACAATAGAA	0.174137
YBR216C-U	AACTCGCGGTCACTGTCTGT	0.972144
YBR217W-D	CCCGAGGTCAAAGATGCGAA	0.994693
YBR217W-U	ATTCTCCGGCGAGTGTCTGT	0.994887
YBR218C-D	CGCGCCCTGAAAGAATCGAA	0.985217
YBR218C-U	ATTACTGAGTCTGGACGTGT	0.991616
YBR219C-D	CGGACTAGCAAACTGTCGAA	0.987505
YBR219C-U	ATTGCTCGACGGCTACGTGT	0.231008
YBR220C-D	CCTGGATTCAAAGTGAGGAA	0.949701
YBR220C-U	AGCTTATCCTCATACCGTGT	0.984848
YBR221C-D	CACATTGGCAAACGGCGGAA	0.985528
YBR221C-U	ATGTACTCCCTCTCAGGTGT	0.0231072
YBR222C-D	CCCGTGGAGAAATGTATGAA	0.984518
YBR222C-U	ACCTGCGTTGCACTTGGTGT	0.0111387
YBR223C-D	CCCGGCTAGAAATATCTGAA	0.990236
YBR223C-U	AGACTCTCCTTAGACTGTGT	0.996234
YBR224W-D	CGCCTGTAGAAAGACTTGAA	0.961509
YBR224W-U	ACTCACCGTGGTCAGTGTGT	0.962955
YBR225W-D	CCGCGCACGAAACATTTGAA	0.961102
YBR225W-U	ATGACCTCCGCGACTTGTGT	0.972591
YBR226C-D	CCCTCTGCGAAACTGAATAA	0.956113
YBR226C-U	AGCCTACTCTTCACGATTGT	0.987525
YBR227C-D	CCGCTTGGGAAATAGCATAA	0.986051
YBR227C-U-E	ACCTGAGCGGATGTATGTCG	0.993105
YBR228W-D	CCCTCGTACACAATGGATAA	0.993718
YBR228W-U	ATTGTAGCTCCCGCGCTTGT	0.992576
YBR229C-D	CGCCGTGTGAAACATACTAA	0.993512
YBR229C-U	ATCGTAGTGTCACGGCTTGT	0.987024
YBR230C-D-N	CCGGCAGCGAAAATATCTAA	0.974714
YBR230C-U	ACGTCTAGGCGATGTCTTGT	0.989246
YBR231C-D	CAGACGGTCAAATCCTCTAA	0.882851
YBR231C-U	ATGGCCGCTTCAGCCTTTGT	0.872935
YBR232C-D	CCTGGCCTGAAATCAAGTAA	0.997136
YBR232C-U	AGCTGTCCCTTCATCGAATT	0.99801
YBR233W-A-D	GATCCATCCGCACTGGTTTG	0.0085761
YBR233W-A-U	TACCTAGACGCGAGCACTTG	0.0205779
YBR233W-D	CGTGCTTAGAAAGGCAGTAA	0.990754
YBR233W-U	ATGCCCGAGTTGTCGCCATT	0.0188553
YBR234C-D	CCATAGGTCAAACTGCGTAA	0.0719651
YBR234C-U	ACTGGGTCACTGGTGCCATT	0.0753486
YBR235W-D	CCGATAGTCAAATGCGGTAA	0.990784
YBR235W-U	AGGGCGACTGTGATTCCATT	0.968629
YBR236C-D	CACTCTGTCAAAGTCGGTAA	0.92266
YBR236C-U	ATTTCGTCGAGCCGCGCATT	0.982041
YBR237W-D	CCCAGCTCGAAATGGATTAA	0.0497175
YBR237W-U	ACCGCTGCGAGGCTTAGATT	0.0188604
YBR238C-D	CCGTGCAGGAAATGACTTAA	0.984713
YBR238C-U	ATGAGTCTCTTCCACCGATT	0.947304
YBR239C-D	CCGGCTGCTAAATACTAACA	0.996214
YBR239C-U	ACACCTGAGTAGGCGCGATT	0.995514
YBR240C-D	CGGCGCGATAAAGTCTAACA	0.991762
YBR240C-U	ACTGTACTACTCGCTCGATT	0.984928
YBR241C-D	CCCTGCGATAAATGGTAACA	0.971111
YBR241C-U-N	TCCCTGTATGGAGAGTGATT	0.977207
YBR242W-D	CCTTCAGGGAAACGATCACA	0.980516
YBR242W-U-T	AGCGCGTAGTTCGTGATTTT	0.987286
YBR243C-D	CCCTGGGCTAAATCAAGACA	0.936869
YBR243C-U	ACGTAGGGATGATCGCTATT	0.95245
YBR244W-D	CCTATCGAGAAAGGGCGACA	0.989865
YBR244W-U	AACGCCTGGTCACTGCTATT	0.992654
YBR245C-D	CCCTGCCGTAAATGAATACA	0.970543
YBR245C-U	AGGGCTCTATTCAGCGTATT	0.988737
YBR246W-D	CCGCATAGGAAAGTTCTACA	0.982387
YBR246W-U	AGGCACGCACGACTCTTATT	0.635542
YBR247C-D	CGCTAGGTAACAATGGTACA	0.0180068
YBR247C-U	AAGCTGACCTTCTTGCACTT	0.0188669
YBR248C-D	CTCCCAGTGAAAGAGGACCA	0.966068
YBR248C-U	AGGCACTTGCTCCAGGACTT	0.333319
YBR249C-D	CCTGCAAGGAAAGGTGACCA	0.0120062
YBR249C-U	AGTGCTACTCTGACCTACTT	0.0214401
YBR250W-D	CCGTGTCATAAAGACTACCA	0.970671
YBR250W-U	ATGGCCGTGTCAGCCTACTT	0.989118
YBR251W-D	CGCTAATTGAAATAGGCCCA	0.979512
YBR251W-U	ACGAGGTCTTGCATCTACTT	0.972135
YBR252W-D	CCTCGAATGAAAGTATCCCA	0.894163
YBR252W-U	ACGCGCTGCTTAGATTACTT	0.324354
YBR253W-D-N	CCGACATTGAAAGACGGCCT	0.895357
YBR253W-U	ATCAGGTGGTCATGGCCCTT	0.971336
YBR254C-D	CCGTAGACGAAATAGCTCCA	0.880947
YBR254C-U	ATGTTGCGACTACGCGCCTT	0.902622
YBR255W-D	CCCTTGGATAAAGCGAAGCA	0.982155
YBR255W-U	AAGCGTCTGTCATTCGCCTT	0.984076
YBR256C-D	CGCCGGTGTAAAGATAAGCA	0.927319
YBR256C-U	AGGGATATGATACGTGCCTT	0.973828
YBR257W-D	CCCGTCCAGATAAAGGAGCA	0.934511
YBR257W-U	ACGGCTACTATGATCTCCTT	0.971725
YBR258C-D	CCCACCTTGAAAGTATAGCA	0.0394384
YBR258C-U	ATGAGAGCCGGATCGTCCTT	0.990353
YBR259W-D	CTCCCGACTAAAGAGAGGCA	0.974225
YBR259W-U	AGGCGTCGCTTCATGTCCTT	0.982886
YBR260C-D	CATACGTTGAAACTACGGCA	0.988639
YBR260C-U	AATGTGGCCTCGATCCGCTT	0.981363
YBR261C-D	CATACAGGGAAAGTTCGGCA	0.985405
YBR261C-U	AAGGATTGGTCAGATCGCTT	0.98215
YBR262C-D	CCGTACTGCAAAGAAGGGCA	0.0222746
YBR262C-U	AGAGTGTGCCTACCTCGCTT	0.981758
YBR263W-D	CCCTTATACACAAGTTGGCA	0.980963
YBR263W-U	AAGTCGTGGTCATCTCGCTT	0.987694
YBR264C-D	CCTGACAAGAAAGGTTGGCA	0.980493
YBR264C-U	ATGCTTCGAGTCCGAGGCTT	0.0492997
YBR265W-D	CCCTACTTAACAAGAGTGCA	0.94025
YBR265W-U	AGGCTTTGCTCACTCGGCTT	0.976577
YBR266C-D	CGAAGAACTCCCAATTTGCA	0.259577
YBR266C-U	AAGGACTGTGTCACTCTCTT	0.0899264
YBR267W-D	CCGGCACGTAAAGGAGATCA	0.14402
YBR267W-U	ACGAGCTAGTTCTCAGTCTT	0.0806061
YBR268W-D	CGCCGGGATATAAAGGATCA	0.978022
YBR268W-U	ACCCGTGATGTAGATGTCTT	0.979135
YBR269C-D-E	ATATGGCCGGATCGCTGCAT	0.831612
YBR269C-U	CATCTATTATCAGGAGGAGG	0.914038
YBR270C-D	CAGAGCGTGTAACATCTTGC	0.975622
YBR270C-U-N	CATCATGACGCATAGGAGGT	0.978207
YBR271W-D	CCTAGTAATCACGATCTTGC	0.986547
YBR271W-U	CTTCTATTCAGAGATGGAGG	0.966357
YBR272C-D	CAGACGAGTGGACATTATAG	0.754113
YBR272C-U-E	GATTATCGTACGCTGCGTAT	0.123451
YBR273C-D-T	GGGCGATATCCAGCCTAGTT	0.964669
YBR273C-U	ATTTGTGTCCCATGCGCCTG	0.949719
YBR274W-D	GGCTCATCTCTAATCACTAG	0.0711193
YBR274W-U	ATTCTGCGTAGCATCGCCTG	0.0120045
YBR275C-D	AATGCAGCGTAAGTCACTAG	0.967124
YBR275C-U	TATCTGATGCCAGTCGCCTG	0.982621
YBR276C-D	CATATAGACTCAGGGATAGG	0.989534
YBR276C-U	ATGCACGACTTCTGAGCAAT	0.988023
YBR277C-D	CACCTCCATAGAGTGATAGG	0.90398
YBR277C-U	CAATGACGAGTTGAGGCAAT	0.869258
YBR278W-D	TGTCACGATCCATCTCTAGG	0.689736
YBR278W-U	TGTCTAGCACGTCCTGCAAT	0.0761219
YBR279W-D	TACAGCTCTAGCAGCGTAGG	0.668748
YBR279W-U	AGGCTCGCATTTGGATCAAT	0.0435243
YBR280C-D	TATTCGCTCAGAGGTGCCTG	0.0102437
YBR280C-U	TGTCGAGCTGCGAGATCACT	0.923504
YBR281C-D	ACGCAGTGAGTAGCATCCTG	0.790386
YBR281C-U	CGAGATAAGGTGCGATCACT	0.82224
YBR282W-D	ACTCAGTCACGATGATCCTG	0.906211
YBR282W-U	TGCTACGAGCTATACTCACT	0.928759
YBR283C-D	TATGCGGAGCCAGTATCCTG	0.955673
YBR283C-U	ATAGCTTATGCAGCCTCACT	0.973013
YBR284W-D	CAATCTGTAGGCAGCGGAAT	0.828326
YBR284W-U	CGCTTAGATGGCTATATGGT	0.809204
YBR285W-D-E	TGATGCATTCTCGGAATATC	0.985426
YBR285W-U	CATACTCTGTCATACCTGGT	0.97773
YBR286W-D	ATGCTGCCAGGTGAGATAAT	0.845
YBR286W-U	ATCATCGTCGTCAGCCTGGT	0.808693
YBR287W-D	CATCTGACACTGGTGCTAAT	0.988479
YBR287W-U-E	CTGTCTCTCATGCCTGATCG	0.872136
YBR288C-D	GCAGCGGATAGATATAGACT	0.939564
YBR288C-U	GCGATCTCGAAAGCCATACA	0.966536
YBR289W-D	ATGACGGATGTATGACGACT	0.00771755
YBR289W-U	GCCGACTGGAAACTCATACA	0.018845
YBR290W-D	ATTATGCACTGGGAGCGACT	0.969681
YBR290W-U	GCTCATTGGAAACCACTACA	0.948826
YBR291C-D	AGATTGCTGCCACTGCGACT	0.0174474
YBR291C-U	CCCTCGATGAAATGACTACA	0.803551
YBR292C-D	ATGAGGACTTGACTGCATGT	0.991754
YBR292C-U	GGGACGAACACACCATGTCA	0.98529
YBR293W-D	CAACGGGATCTATTGCATGT	0.971532
YBR293W-U-N	CCGTAGGCAAAGCATGTCAT	0.982218
YBR294W-D	CAACCGTGAGGAGATCATGT	0.986392
YBR294W-U	GCCGCGAATACAAGATGTCA	0.9883
YBR295W-D	AAGCCTTCAGTGCGTCATGT	0.82921
YBR295W-U	CCAGCTACTAAAGGATGTCA	0.870902
YBR296C-D	TGCGACGGCACAAGAGTACA	0.0197113
YBR296C-U	CACGACCGACAATATGGTGA	0.989469
YBR297W-D	CGCCTGATGAAAGACGTACA	0.026565
YBR297W-U	CAGAGCTTGACAACTGGTGA	0.799224
YBR298C-D	CCAGCGTGGAAATCATTACA	0.762452
YBR298C-U	AACAGAAGCCCATGTGGTGA	0.775839
YBR299W-D	ACCCTTCTGAGACGGTAGTG	0.99642
YBR299W-U	AATTAGACCTCCCTACAGTG	0.512519
YBR300C-D	GCGGCCATAAGCAATTTACA	0.994414
YBR300C-U	GAGACCAGACCAACCTGTGA	0.521353
YBR301W-D	GACCAATTCACACGTTGTCA	0.991415
YBR301W-U	CAGATGAGGCAAGTGCATTA	0.988933
YCL001W-A-D	GCCGCAGTGACAATAATTCA	0.854639
YCL001W-A-U	CAGCACCTGCAAGATCATTA	0.0226048
YCL001W-D-N	CAATCTGTTACAACCCGTAT	0.984705
YCL001W-U	CCGTGGCTGAAAGTTTATCA	0.987891
YCL002C-D-N	CAGAAGGCTCAATTCCGTAT	0.985641
YCL002C-U	CCGGATACTAAATGGACTCA	0.0145637
YCL004W-D	CTAATTGGTAGCAAGGCGTA	0.932196
YCL004W-D-S	CAATTAGGTCCAAGAGCGTA	0.0205827
YCL004W-U	CCGGACGATAAAGATTCTCA	0.981855
YCL004W-U-S	CGTTAGTACAAAGCACCTCA	0.0145762
YCL005W-D	CCCGACATTCAATTTGCGTA	0.236544
YCL005W-U	CAGACTTGGAAACCTTCTCA	0.185829
YCL006C-D	CCCGCTAGTCAATAATCGTA	NA
YCL006C-U	CCTGAAGATAAATCCCGTCA	NA
YCL007C-D-N	CAAGGTGCCCAAGATCGTAT	0.0188292
YCL007C-U	CAGAACGTCCAATTTCGTCA	0.0180054
YCL008C-D	CAGACGTTTACAAGCTCGTA	0.506739
YCL008C-U-N	CCAGTCTTCAAACGTTTCAT	0.75819
YCL009C-D	CAATGGCGTCCAAGGTCGTA	0.984585
YCL009C-U	CCCGGCACAGAATAATTTCA	0.978622
YCL010C-D	CAACTCACGGCAACGAGGTA	0.527177
YCL010C-U-N	CCGTCGCTACAAGGACACGA	0.260183
YCL011C-D	CGCTCTATTACAATCCGGTA	0.00661672
YCL011C-U	CCTCTGGGACAAGACGAAGA	0.398146
YCL013W-D	CGCTCGAACATAATTGGGTA	NA
YCL013W-U	CCTGTCAGTAAACCGAGAGA	NA
YCL014W-D	CAGAACTCCGAATTGGTGTA	0.985932
YCL014W-D-S	CACATTTCTACAACGCGGTA	0.974936
YCL014W-U	CCTGGTTGACAAGAACGAGA	0.985886
YCL014W-U-S	CCTGTTGGACAAGAGTAAGA	0.970717
YCL016C-D	CTAGAACAGGAAGCCTTGTA	0.961934
YCL016C-U	CCAGAGGCTAAATCCCGAGA	0.0145268
YCL017C-D	CCCTTCTAGCAAGTGTTGTA	0.0214382
YCL017C-U	CTTCAGCGTAAACGAGGAGA	0.0377325
YCL022C-D	CGCCACGTAATCAAGACTTA	0.972165
YCL022C-U-N	CCTAGCGGTAAAGTGATAGT	0.96893
YCL023C-D	CAGGAGGCGCAATACCCTTA	0.976356
YCL023C-U	CCGCTCTGTAAATACCTAGA	0.975496
YCL024W-D	CCGAATCGAGAACAGGCTTA	0.988245
YCL024W-U-N	CCCAGGAGTAAATTGCTAGA	0.985204
YCL025C-D-N	CCTGAAGATCAACTTGCTTA	0.981693
YCL025C-U	CTGGCTAGGAACCAAGTAGA	0.0102827
YCL026C-A-D	GGCGGACTACAACACATTCA	0.97672
YCL026C-A-U	GCTCACCGAACATCAGATTA	0.86979
YCL026C-D	CCTCCGAACAGAGAGTCTTA	NA
YCL026C-U-N	TCCTCTGCTAAGTAGTAGAT	NA
YCL027W-D	CCCATTAGTCGCAAGAGTTA	0.965392
YCL027W-U	CCGCGTCGTAAATGATTAGA	0.891913
YCL028W-D	CATATTACGCAAGGCCGTTA	0.952594
YCL028W-U-N	CTGGGCCGAGAATCAACGAT	0.968677
YCL029C-D	CGCGTTATGCAATACGGTTA	0.952493
YCL029C-U	CTTTCGGAGCAAGAAGACGA	0.963075
YCL030C-D	CCAGATGTTCCAATGGGTTA	0.989423
YCL030C-U	CATAGTCCTAAACGTGACGA	0.32576
YCL031C-D	CCGATTTCGCAACATGGTTA	0.012864
YCL031C-U	CCTCATAGTAAAGTCACCGA	0.0128637
YCL032W-D	CAGAGCGAAGAACCCTGTTA	0.233252
YCL032W-U	CACTTATTGAAAGCTCCCGA	0.290506
YCL033C-D	CCGGTAGCTGAACAGATTTA	0.95275
YCL033C-U	CCGTCTTAAACATGATCCGA	0.00933739
YCL034W-D	CGGCCTTGAATGCAACTTTA	0.983479
YCL034W-U	CAGAATGGTAAATCCCGCGA	0.0239763
YCL035C-D	TTTGTTCCACGGCCACGATG	0.997065
YCL035C-U	TACTGCTAACCATGCTTGGC	0.99134
YCL036W-D	CAGACGCCTCAAGTAGTTTA	0.928164
YCL036W-U	CACCATTTGAAACGGATCGA	0.880702
YCL037C-D	CTGTCGCACGAAGGAGAAAC	0.967768
YCL037C-U	CCGAGACTTAAATGGATCGA	0.950636
YCL038C-D	CACCTTTCGAGAGGACGATG	0.994725
YCL038C-U-N	GGTTCTACACACCATAATGA	0.995923
YCL039W-D	CCAGCCTAAGAATGTTCAAC	0.995737
YCL039W-U-E	CCCGTGTCTAAATGATTCGT	0.978609
YCL040W-D	CCGTGCGTAGAATGAAGAAC	0.992038
YCL040W-U	CCGCCAAGCGAATTGAAGGA	0.0137203
YCL041C-D1	CCGTCGGCATAATAGAGAAC	0.0137217
YCL041C-D2	ACCGTGTTGTAATGACGATG	0.0197252
YCL041C-U1	CCTCGGAAGCAACTACAGGA	0.0162808
YCL041C-U2	CGATCCAGAGTAATAGATGC	0.0214068
YCL042W-D	CCTGGCTAAGAAGTATGAAC	0.99413
YCL042W-U	CCGACTATTAAATGCGAGGA	0.0205715
YCL043C-D	CCTTGACCAGAAGCGATAAC	0.014578
YCL043C-U	CATTCGGGTAAATCTGAGGA	0.0171515
YCL044C-D	CCCGTCTAGTCAATGATAAC	0.983448
YCL044C-U-N	CATCAGGGACACGTTAGGAT	0.0145441
YCL045C-D	CCGGAGACATAATTTCACAC	0.992229
YCL045C-U	CAGCAAGCCCAACTTTAGGA	0.33077
YCL046W-D	CCACGAGGAGAATTAGGCAC	0.979293
YCL046W-U	CCTGAATGCCAAGTAACGGA	0.871189
YCL047C-D	CCATATAGAGAACCGGGCAC	0.994552
YCL047C-U	CACAGCGTTAAACTCACGGA	0.867111
YCL048W-D	CGTAATAACGAATCGCTCAC	0.967183
YCL048W-U-N	CACGGTGTAAATTCGCGGAT	0.975731
YCL049C-D	CCGCGACATTAAGTCAAGAC	0.997928
YCL049C-U-N	CCCTGTGTAAAGACTCGGAT	0.997345
YCL050C-D	CCGCTCGTATAATAGAAGAC	0.894771
YCL050C-U	CCATACACTACAAGTTCGGA	0.811794
YCL051W-D	CCGTGACTAGAATTACAGAC	0.0171153
YCL051W-U	CACATGGTTAAACTGAGGGA	0.968584
YCL052C-D	CCTTAGCGAGAATAGGAGAC	0.0557242
YCL052C-U	CCATCTGGAAGAATTAGGGA	0.979802
YCL053C-D	CATAGTCGAGAACCGGGACA	NA
YCL053C-U	CTATTGTTGAAATGCCGGGA	NA
YCL054W-D	CCCTGATACTCAAGTTAGAC	0.941139
YCL054W-U	CCTCATGTTAAAGAGTGGGA	0.987342
YCL055W-D	CCACGGATAGAACTGAGGAC	0.948007
YCL055W-U	CAGAGTCTTAAACGCCTGGA	0.597447
YCL056C-D	CCTACTCGATAATTGAGGAC	0.892385
YCL056C-U	CGGTAAGCAACATTAGTGGA	0.449633
YCL057W-D	CCAAATGGAGTGCAACGGAC	0.995509
YCL057W-U	CCGCCACTAATAGAATTGGA	0.989015
YCL058C-D	CTAATGCGGTTTAAGCGATG	0.616153
YCL058C-U	CTACCTGGTCGAGATGATGT	0.692124
YCL059C-D	CGGGACAGAGACTTAATGAC	0.923915
YCL059C-U	CCGACTGGACAAGTTAATGA	0.853463
YCL061C-D	CAGACGGTAACAGACCTGAC	0.975253
YCL061C-U	CCTGTCGAAGAAGGAACTGA	0.977853
YCL061C-U-S	CGCCCGAACGGAAGATATGA	0.0213486
YCL061C-U-S-N	TGCCCGAACGGAAAATATGA	0.019676
YCL063W-D	CCACGACGAAGTGAATTGAC	0.817799
YCL063W-D-S	CCTATAAGCGAACTTCTGAC	0.930402
YCL063W-U	CAGAGAGGTAAACTTCCTGA	0.0648832
YCL063W-U-S	CACCTTGTTAAAGTGCCTGA	0.887229
YCL064C-D	CCGCACTAATAACTGTTGAC	0.0240114
YCL064C-U-N	CCGCTAGTTAAGTACGCTGA	0.030009
YCL069W-D	CCAGGCATAGAAGGTTATAC	0.978931
YCL069W-U	CCCAGTTGTAAAGAGTGTGA	0.94898
YCL074W-D	CAGGGAATCGAATCTACTAC	0.0154325
YCL074W-U	CGCGAGAATAACGTACTTGA	0.977038
YCL075W-D	CCCGATGGATAATTGTCTAC	0.993869
YCL075W-U-T	CACATAACGAACTGTTGCTT	0.99434
YCL076W-D	CAGTGAACCGAACGCAGTAC	0.993171
YCL076W-U-N	CCGCCGATAGAATTTGTTGT	0.989567
YCR001W-D-N	CATTACCGAACGTGGCGTAC	0.97693
YCR001W-U	CCGACCACGCAATTATTTGA	0.955388
YCR002C-D	CAGCTTTCAGAACTGGGTAC	0.100287
YCR002C-U	CCGTGTCCAGAACTAGAATA	0.0666395
YCR003W-D	CAGTCGGTAGAACTATGTAC	0.967855
YCR003W-U	CCAGTACGCCCAATGGAATA	0.966906
YCR004C-D	CAGATACGGGAACACTGTAC	0.975302
YCR004C-U	CCTGCGAAGGAATTGGAATA	0.98778
YCR005C-D	CCAGGTGTAGAATAGTGTAC	0.982104
YCR005C-U	CCTTTCGAGCAACCTTGATA	0.98422
YCR006C-D	CCGCTGTTAGAAGATTGTAC	0.981537
YCR006C-U	CCCTGCTTACCAAGTTGATA	0.969305
YCR007C-D	CAGAGACCGTCAAGGATTAC	0.96923
YCR007C-U	CCGCGACCTCAATAAGTATA	0.96013
YCR008W-D	CCCGCTGTATAATTGCTTAC	0.191407
YCR008W-U	CCGGAAGCGCAAGTAGTATA	0.182193
YCR009C-D	CCTTGATACGAAGCAGTTAC	0.340388
YCR009C-U	CGGCGAAGGAACCATGTATA	0.463195
YCR010C-D	CAATCTACGTCAAGCGTTAC	0.978999
YCR010C-U	CCGGCGGATGAAGAATTATA	0.964957
YCR011C-D	CAGACTTTAGAATGTCCACC	0.985005
YCR011C-U	CACTCGACGCAAGGTTTATA	0.449267
YCR012W-D1	CCTTACATAGAATAGGCACC	0.0137129
YCR012W-D2	GATCATACGCTCATGCGATG	0.921497
YCR012W-U1	CCAGTGACGCAACTTTACTA	0.0145535
YCR012W-U2	TATGGCGATCCAGTGTCCTG	0.974107
YCR013C-D1	CGCCTATAACGAGAGAGACC	0.0214358
YCR013C-D2	AGTCACTACCGATCTCGATG	0.0257048
YCR013C-U1	CCGAATGTAGAATTGGCCTA	0.00771243
YCR013C-U2	CTATGCGATACATGGGTGTC	0.0256894
YCR014C-D	CACATGGAATAACTTGGACC	0.987765
YCR014C-U	CCTAAGTCTCAAGAAGGCTA	0.0197203
YCR015C-D-N	CGTTAAGATACAGCCATACT	0.977406
YCR015C-U	CCGAAGTGGCAATAAGGCTA	0.971859
YCR016W-D	CATACTTACGAAGCTGTACC	0.975093
YCR016W-U	CGAATTAACCGCAACTGCTA	0.974322
YCR017C-D	CAGAAACGAACATTGTCGCC	0.939383
YCR017C-U-N	CCGGCGTATCAATTTCTCTT	0.963178
YCR019W-D	CACAGTAATGAACCGTTGCC	0.871881
YCR019W-U	CAAGGACCCGCAAGTGTCTA	0.915104
YCR020C-A-D	CGGCGCTTTCAATTATATCC	0.986416
YCR020C-A-U	CCGGCGATTCAATAAGAGTA	0.014571
YCR020C-D	CAGACAGTTTCAAGGAATCC	0.962301
YCR020C-U	CAAGGTCTGCCAAGTTTCTA	0.467879
YCR020W-B-D	GCGACTCTAACAAGCATTCA	0.012001
YCR020W-B-U	CTTGCGAGAGAACGAGATTA	0.0171492
YCR021C-D	CGCACCTAGATAAGATTTCC	0.98138
YCR021C-U	CAACTAGCCGCAAGGGAGTA	0.981897
YCR022C-D	CACATGGGCGAATTATTTCC	0.984721
YCR022C-U	CCGCCACGTACATATTAGTA	0.959986
YCR023C-D	CGTGGCGATAATACGAAAGC	0.9734
YCR023C-U	CACGAATCGGAATTGACGTA	0.983147
YCR024C-A-D	CAATGCGACCCAAGGTGTGA	0.0234564
YCR024C-A-U	GATGACATGGAATGAATCCC	0.83918
YCR024C-D	AAGCTGGTACAATCGTGTGA	0.78673
YCR024C-U	AATAGTGTGCAACTCTGCCC	0.744795
YCR025C-D	ACATACAGCCAAGGGTGTGA	0.833871
YCR025C-U	AGTGATCGTCAATTCATCCC	0.829532
YCR026C-D	GCATCTGTGACAATGTGTGA	0.820762
YCR026C-U	AGCAGAGTCTAACAGATCCC	0.0141267
YCR027C-D	GCGCGGCTGCAATTATATTA	0.902718
YCR027C-U-N	CATGATATGAAGTTTCCGCT	0.829714
YCR028C-A-D	GCTTACATGCAAGGCACTTA	0.0171523
YCR028C-A-U	TACTAAGAGGCATGAAGCGC	0.0128639
YCR028C-D	CGCGACATCATAGCAACTTA	0.812062
YCR028C-U	TAAACACAGTGCTCAAGCGC	0.68565
YCR030C-D	TGAGCATCCACACAGACTTA	0.965881
YCR030C-U	GCAGACCTATACATAAGCGC	0.969536
YCR031C-D	GCATGTAGTCAATGTCTCCC	0.907549
YCR031C-U	AATGCCCTGGAAGTGATTGC	0.865774
YCR032W-D	CAGCATGTTCAATAAGTCCC	0.944943
YCR032W-U	CATCGTATGGAAGGTATTGC	0.919495
YCR033W-D	AGAGCAGAGACATTATTCCC	0.941501
YCR033W-U	GATTAGCTCACATACCTTGC	0.832166
YCR034W-D	GCTATATGCACAGAGTTCCC	0.666748
YCR034W-U	TTGATGCACAGGCAGCTTGC	0.698912
YCR035C-D	TATTAGCAGGCACAGAGCGC	0.132668
YCR035C-U	TCACTGAGAGCAGATGATAG	0.859384
YCR036W-D	TACATGGAGATAACGAGCGC	0.739454
YCR036W-U	CAGTCATCGTAACCTGATAG	0.7746
YCR037C-D	AATCAGTATGAAGCGAGCGC	0.724625
YCR037C-U	AATAGGCGCTAAGCTGATAG	0.586062
YCR043C-D	ATCCTATACACATGGAGCGC	0.534338
YCR043C-U	CAGTGGATCTAACGTGATAG	0.97434
YCR044C-D	GCGAGTCATACATATCTTGC	0.852751
YCR044C-U	GATCTACACTGATATGGAGG	0.827475
YCR045C-D	ATGATCCCACTAAGTCTTGC	0.869785
YCR045C-U	GATTCATCTACATGCTGAGG	0.806208
YCR046C-D	TACCATGCTGAAGGAGTTGC	0.0642236
YCR046C-U	AGCACCTGACGCATCATAGG	0.802705
YCR047C-D	TATGATAGCCACCGCGTTGC	0.328934
YCR047C-U	CATTCAGTGAGCCAGATAGG	0.399144
YCR048W-D	CGACATGATACATACGACTC	0.98607
YCR048W-U	AATATGTCATGGACGGCCTG	0.831996
YCR049C-D	GCTCTCATATAACTGGACTC	0.963903
YCR049C-U	TATGCTGATCCACTGGCCTG	0.953666
YCR050C-D	GACAGGAGCTATAATGACTC	0.847668
YCR050C-U	ATACTATCGGCCAGTGCCTG	0.836291
YCR051W-D	CAGCAGACGTAAGATGACTC	0.975841
YCR051W-U	TATCTCTGAGGACGTGCCTG	0.970574
YCR052W-D	GATGTACGACCACTGCTGTC	0.874333
YCR052W-U	AAGCGTCCATGTGCCTCAAT	0.921221
YCR053W-D	ATACACCGGCATAATCTGTC	0.960843
YCR053W-U	GCTCGCTAGATTGAGAGAAT	0.855791
YCR054C-D	AGAGCCATGCACGATCTGTC	0.924984
YCR054C-U	CAGTCGAGATTTGCACGAAT	0.971388
YCR057C-D	CACTAGCGATAAGTTCTGTC	0.632519
YCR057C-U	CTCTCATCGAGGGCAGGAAT	0.978885
YCR059C-D	CGCATGGTATCTAAGACTAG	0.967458
YCR059C-U	TTGGCGCATCGCTAGTCACT	0.971719
YCR060W-D	GCATGATCGTAATGGACTAG	0.980792
YCR060W-U	ATGGCGTCACGATGGTCACT	0.976489
YCR061W-D	CAGCTCGCGTAATATACTAG	0.433701
YCR061W-D-S	GCACTCATAGCACTTACTAG	0.973009
YCR061W-U	GGTGCTCAGTCATCTTCACT	0.786879
YCR061W-U-S	CAGAGTACGTGAGATAGACT	0.918588
YCR062W-D	GCACTCATAACACTTACTAG	0.645903
YCR063W-D	ATCCATGCAGTCCAGAACGG	0.121463
YCR063W-U	AATACTGAGTGCGATCTGGT	0.0531345
YCR064C-D	TGACTGATCGCATACCACGG	0.0111445
YCR064C-U	TGGTCATCGCTCACTCTGGT	0.0128635
YCR065W-D	TATGTTCACGCATCGCACGG	0.892351
YCR065W-U	TCTACGCTGCGATGATTGGT	0.956561
YCR066W-D	ATGTACCGAGCATTGCACGG	0.0925574
YCR066W-U	GAGCTGATGTCACTCTTGGT	0.10765
YCR067C-D-N	ATATGGATGCCGCACTCCCG	0.987425
YCR067C-U	GCGCGGATGAAACAGCTACA	0.988886
YCR068W-D	ATAGGTATCGCACGCTCCTG	0.878241
YCR068W-U	TGGGCAGACACAACGCTACA	0.886234
YCR069W-D	ATTGCATGAGCAGAGTCCTG	0.982655
YCR069W-U	GGCTACACGAAATCGCTACA	0.977639
YCR071C-D	ATAGGTGCTCCATCGTCCTG	0.850425
YCR071C-U	GCGCCGTGAATAAATCTACA	0.837397
YCR072C-D	CTCAGCCGATGCAGTGTAAT	0.932898
YCR072C-U-E	ACACTTAAACGCTGTTACGT	0.861027
YCR073C-D	CAGCGCGAGATGAGCTTAAT	0.988536
YCR073C-U	GCCTATGTCACAATCTGTCA	0.978939
YCR073W-A-D	TGATGCAGCCTGAGCCACAT	0.988598
YCR073W-A-U	GATAACCAACCAGTCTGTCA	0.989442
YCR075C-D	ATGGACCGCTCGATGCACAT	0.986444
YCR075C-U	CCAGTTGGCAAATCTTGTCA	0.990637
YCR076C-D	TCACTCGGTGCATGAGGACT	0.977236
YCR076C-U	CATTAGCCAACATGCTGTGA	0.990819
YCR077C-D	GTCCAGCGTCTCAGATGACT	0.778576
YCR077C-U	CAGCGAGCAACACTCTGTGA	0.65679
YCR079W-D	GAGCATGAGGTACTATGACT	0.984667
YCR079W-U	CCAGTGATCCAATTCTGTGA	0.969374
YCR081W-D-N	CTACTGGTGTGAGCTGACTT	0.800406
YCR081W-U-N	TCCATCAGAAGCAGTGTGAT	0.855503
YCR082W-D	AATTGCCGCTGAGCCGATGT	0.0497288
YCR082W-U	GCACGCCATCAACTAGATTA	0.975914
YCR083W-D	CCTGCTGACGTTAGCGATGT	0.0077186
YCR083W-U	GCCTGCCATCAATTCGATTA	0.246797
YCR084C-D	CACTACTGCGGATGCGATGT	0.838771
YCR084C-U	CGCATCAGTGCAATGGATTA	0.760962
YCR085W-D	TCAGCTATGCGACTGGATGT	0.835305
YCR085W-U	CATCTCAGGCAACGTGATTA	0.867832
YCR086W-D	GCGCCATCACAAGATTTACA	0.599961
YCR086W-U	CAGAGCTGTGCAATGATCCC	0.987917
YCR087C-A-D	CGCGGCTACACATATTTACA	0.806461
YCR087C-A-U	AAATGATGCTCAAGACTCCC	0.851741
YCR087W-D	TTTGCTGCACAAGACAACCA	0.909642
YCR087W-U-N	AGAGTCGTGCAATAGCTCCT	0.762261
YCR088W-D	GTGTGCATGAAACCCAACCA	0.987897
YCR088W-U	AGAGTGAGCACATATCTCCC	0.96395
YCR089W-D-N	GGCACATCTACACGCATTCA	0.903911
YCR089W-U-N	CATACATCTGAGTAAGCGCT	0.0135223
YCR090C-D-N	GATGTTCACCATAGTCCTCT	0.965954
YCR090C-U	CGCTCATATTGAATGCCATC	0.980654
YCR091W-D	TCACGTTACTGAATGTCCTC	0.0162311
YCR091W-U	AAGGTACAGTAAGGTCCATC	0.822206
YCR092C-D	GCTACATCGTAATTGTCCTC	0.987937
YCR092C-U	GCCCATAGAGGATAAGCATC	0.987785
YCR093W-D	TTGGGTACGACAGGTTCCTC	0.934249
YCR093W-U	TAGAGTACGCACAGCGCATC	0.97887
YCR094W-D	GATAGGACTCTCCGAAGCTC	0.63868
YCR094W-U	ACCACGATTGGAAGGGCATC	0.627123
YCR095C-D-N	AAGAGTAAGCCCACAGCTCT	0.125395
YCR095C-U	CATGGTAGATAACTGGCATC	0.940326
YCR098C-D	TAGCCAGGTGTAACCAGCTC	0.98815
YCR098C-U	AGGAGTACAGCCACTGCATC	0.986082
YCR099C-D	AACACTGCCTGAAGTAGCTC	0.0214092
YCR099C-U	ACTCGACGATAACGTGCATC	0.993076
YCR100C-D	GTGCCATGTGCATAACGCTC	0.990731
YCR100C-U	CCTACAGAGCGATAATCATC	0.997815
YCR101C-D	TTAGAGACGAGACCACGCTC	0.552728
YCR101C-U	GAAGTACACTGAAGCTCATC	0.971536
YCR102C-D	AGATAGGATCACAGCCGCTC	0.0934641
YCR102C-U	AGAGGAGCGCACATCTCATC	0.966192
YCR102W-A-D	GCATTTCAGATAATCCGCTC	0.978573
YCR102W-A-U	AGGGACCAGTCACAGTCATC	0.99083
YCR105W-D-N	ATAGGGACTACAGCCTCGCTC	0.97742
YCR105W-U	ACCCAGCATATAAGGTCATC	0.990839
YCR106W-D	AGGTCAGACAGCATTCGCTC	0.968985
YCR106W-U	GGCAGCAGAGTTAATTCATC	0.996031
YCR107W-D	CTTCAGATGAGACTGTAGTG	0.976198
YCR107W-U	TATATGCACGGCGACCAGTG	0.995072
YDL001W-D-T	GTAAGGATATCGTTTTTTTT	0.0204458
YDL001W-U	CCCAAGAAGTGTTAGCAAGC	0.938455
YDL002C-D	CCTGGATTTGAAGCGTATAG	0.956706
YDL002C-U	CCCGTGAATATAAGTGAAGC	0.955945
YDL003W-D	CCTCTAAGCTCACGTTATAG	0.920722
YDL003W-U	CCACAGCTACGGAATTAAGC	0.957725
YDL004W-D	CAACGAGGCGTAATGACTAG	0.0171484
YDL004W-U	CCTATAACTGAAGGGAGAGC	0.0171515
YDL005C-D	CCGGATTGATAATAGGCTAG	0.800241
YDL005C-U	CCAGTTAAGATAATCGGAGC	0.709925
YDL006W-D	CTTCGAGCACGGTACAGTAG	0.669203
YDL006W-U	CAAATACCGTTCAACTGAGC	0.586709
YDL007W-D	CAGACGTGCGTAACTCGTAG	0.829418
YDL007W-U	CGACCCATTAACTGAATAGC	0.859842
YDL008W-D	CATTTGCAGTAAGTCGGTAG	0.265192
YDL008W-U	CCATACGTCCGAATTATAGC	0.394152
YDL009C-D	CATTCGTAGTAACGCTGTAG	0.926111
YDL009C-U	CCCACGACTGAATTATTAGC	0.757097
YDL010W-D	CAACGATACCGAGCCATTAG	0.929279
YDL010W-U	CAGGTCTAGGAATCTTTAGC	0.967163
YDL011C-D	CAAGGTGACGTAATGCTTAG	0.947217
YDL011C-U	CATTAAGACGACTCGAACGC	0.933391
YDL012C-D	CCAGCGAGTTAATGAGTTAG	0.958025
YDL012C-U	CAGATCAGGGAACTTAACGC	0.964179
YDL013W-D	CAGTCTGAGTAATCCGTTAG	0.406657
YDL013W-U	CTGAACAGTTAATTCCACGC	0.315644
YDL014W-D	CCGAGTATTACATTCTCACG	0.02485
YDL014W-U	CCACTTAGTTCAATAGGCGC	0.0999123
YDL015C-D	CTATCATGTTAAGGGAGACG	0.0213969
YDL015C-U	CAACTTTATCGAAGAGTCGC	0.0111491
YDL016C-D	CAGAGGTATTAAGCTAGACG	0.0613943
YDL016C-U-N	CCTCCTAAGTAATGATTCGT	0.0205398
YDL017W-D	CATATAGATTAAGGGCGACG	0.911048
YDL017W-U-T	CCAGACGTGGAACTCGCTTT	0.916901
YDL018C-D	CATAGAGGTTAAGCGATACG	0.967301
YDL018C-U	CCCATACATTGTTAGAAGGC	0.967383
YDL019C-D	CATAGTAGGTAAGCTGTACG	0.948348
YDL019C-U	CACGTAATACTAAGTGAGGC	0.969192
YDL020C-D	CATGACAGTGTTTAGAACCG	0.438529
YDL020C-U	CCATATTTGCGAAGGTCGGC	0.510473
YDL021W-D	CCTTTGAACTGATATGACCG	0.288229
YDL021W-U	CCACGTTGGTCAATATGGGC	0.234507
YDL022W-D	CGCATTCAGTACATTTACCG	0.969724
YDL022W-U	CGGATATGTACTAATTGGGC	0.974026
YDL023C-D	CTAGAATACTAATGTCGCCG	0.93142
YDL023C-U	CTATATTTGGAACGTGTGGC	0.724526
YDL024C-D	CATATCTTCTAACTTGGCCG	0.928986
YDL024C-U	CGATGGTAACTAATGTTGGC	0.648808
YDL025C-D	CAGCTTCTCTAAGTTTGCCG	0.780999
YDL025C-U	CACCACAGGAGGGTAAATGC	0.752725
YDL026W-D	CACTGTAATGTTAAGGAGCG	0.969899
YDL026W-U-N	TCAGGACACTAAGGTAATGC	0.966364
YDL027C-D	CATATTAGTTAAGTGGCGCG	0.948675
YDL027C-U-N	CCGATCTGAAGATTTAATGC	0.934969
YDL028C-D	CCATTAGCTTAACTGAGGCG	0.925288
YDL028C-U	CGCCGCCTTTAATAATATGC	0.960338
YDL029W-D	CCATCATTGTTAATTCGGCG	0.850221
YDL029W-U	CCCGAGTTAATAATCTCTGC	0.849648
YDL030W-D	CCGTGTTATACATTATGGCG	0.914875
YDL030W-U	CCGGACATACTTAATTCTGC	0.884409
YDL031W-D	CCTCAGGTGATTAACTGGCG	0.908281
YDL031W-U	CTAGGGTGAACATTTAGTGC	0.949814
YDL032W-D	CATCTACGGACACGGTATCG	0.986949
YDL032W-U	CTCTTAATTGAAGGTGGTGC	0.959814
YDL033C-D	CCATATACGTTAATGCCTCG	0.963551
YDL033C-U	CACTCCTTGGAACTTATTGC	0.734924
YDL034W-D	CGCTAGTTTCTAAGATGTCG	0.992141
YDL034W-U	CCTGAGTAATAAGTCCTTGC	0.0137085
YDL035C-D-T	CCAGTGTTCTAACGTGCTTT	0.904081
YDL035C-U	CCTTAGGGATAATGAGTTGC	0.729995
YDL036C-D	CGCTCATTATTCCTAAGAGG	0.971822
YDL036C-U	CACAGGAGGTAACACTTTGC	0.957787
YDL037C-D	CACTACTATGTGGTAAGAGG	0.996292
YDL037C-U	CCCGCTAATCTTGTAGAATC	0.992024
YDL038C-D	CCTATCCGTACATATCGAGG	0.972353
YDL038C-U	CCGGGAGCTTAATATACATC	0.990921
YDL039C-D	CCATCTTTGGTAATGTGAGG	0.990348
YDL039C-U	CCGTGTACTGAATTACGATC	0.993148
YDL040C-D	CCGATGGGATTACATATAGG	0.0111458
YDL040C-U	CACCTTGTCGGAAGTGGATC	0.0154342
YDL041W-D	CACCGACTCAGACTTATAGG	0.524773
YDL041W-U	CGGCCTAACTGTAATTGATC	0.116252
YDL042C-D	CGCTATTGCTTAATCGTAGG	0.0992602
YDL042C-U	CCCTGTTATGAACCTTGATC	0.115928
YDL043C-D	CAATGGCTTCTAATGGTAGG	0.931746
YDL043C-U	CCGGTCAGTGAAGTTATATC	0.978798
YDL044C-D	CAGATACTATTAAGTGCCGG	0.0685941
YDL044C-U	CACGTTTGCGAATAGGTATC	0.981704
YDL045C-D	CTTACTTGTAGCATAGAGGG	0.0145634
YDL045C-U	CGGGCTACTACATACTTATC	0.980746
YDL045W-A-D	CTATCCTAGAGATTTGAGGG	0.950306
YDL045W-A-U	CATTAAGGCGCACGTTTATC	0.0239766
YDL046W-D	CACGCTTGACCATCTTAGGG	0.988971
YDL046W-U	CGAGGTACATAAGGGCTCTC	0.0128627
YDL047W-D	CTATGTCTAGCAGTTTAGGG	0.699822
YDL047W-U	CCAGATCATTAACGGTTCTC	0.549034
YDL048C-D	CTATATTTATGGACAGCGGG	0.992388
YDL048C-U	CCGTGCTACTAATGTAAGTC	0.991172
YDL049C-D	CATCATTTGTGGTAATCGGG	0.0188645
YDL049C-U	CCCTGGATTGAATTAGAGTC	0.994779
YDL050C-D	CACTCTGCGTTAATGTTGGG	0.955778
YDL050C-U	CCACCGATGTAATTTGAGTC	0.97654
YDL051W-D	CATATCACGGTTTGGAATGG	0.949253
YDL051W-U	CCTTGTAGTGAAGATAGGTC	0.988434
YDL052C-D	CCGATCCTTTAATGTCATGG	0.976383
YDL052C-U	CTAGAGTTTGGAAGTCTGTC	0.99282
YDL053C-D	CGCTTTATAGGATACGATGG	0.994336
YDL053C-U	CGCGGCTTAATCTCAAATTC	0.0291506
YDL054C-D	CCCTCGTTTGAATATGATGG	0.946877
YDL054C-U	CGCGCATTAGTACGAAATTC	0.433308
YDL055C-D	CCTCAGGCTGTTAAGTATGG	0.938783
YDL055C-U	CAGGCGCTTGAAGTTTATTC	0.991228
YDL056W-D	CCGCTATTATTACAGACTGG	0.990997
YDL056W-DX	CCGCTATTATTACAGACTGG	0.988024
YDL056W-U	CCAGTTCGGGAATGTGCTTC	0.980378
YDL056W-UX	CCAGTTCGGGAATGTGCTTC	0.98901
YDL057W-D	CATGAGTTTGAAGTACCTGG	0.970867
YDL057W-U	CATCTAAGCTAAGGGAGTTC	0.987009
YDL058W-D	CACTATGGTTTAAGAGCTGG	0.938845
YDL058W-U	CGATTCGGACTAATGAGTTC	0.965589
YDL059C-D	CCACTCTGTTAAGTTGCTGG	0.982582
YDL059C-U	CCTCTGATATAATCGGGTTC	0.980908
YDL060W-D	CCAATGCGTTGTAATCGTGG	0.0197244
YDL060W-U	CCCTGATGACTAAGTTGTTC	0.00771833
YDL061C-D	CAAGCGAACCTCCATTGTGG	0.982802
YDL061C-U	CCTCATATCTAAGGCGTTTC	0.0136964
YDL062W-D	CTCTTATAGTGGGACATTGG	0.061715
YDL062W-U	CATCACGACGTTTCTCAAAG	0.00686045
YDL063C-D	CAGGTCAGTACACTTATTGG	0.944252
YDL063C-U	CGCGTACACTTACTATCAAG	0.964812
YDL064W-D	CACTACGTCAGACTTGTTGG	0.932197
YDL064W-U	CAAATTCAATGCGTGGGAAG	0.991274
YDL065C-D	CTACGAGATTCCCGTCAATG	0.972135
YDL065C-U-N	CCCTAGAGAGATTCTGAAGT	0.0051215
YDL066W-D	CATACCTATTGGAGGGAATG	0.994822
YDL066W-U	CCGCTAAGACTGTATTGAAG	0.993022
YDL067C-D	CCTGTTAGTTAATGGGCATG	0.110463
YDL067C-U	CGACTCTAATAGCCGATAAG	0.107046
YDL068W-D	CCGCTAGGTTAATAGTCATG	0.440637
YDL068W-U	CGAGATCGTACCACACTAAG	0.09261
YDL069C-D	CCATTGTGTTAAGGGTCATG	0.977071
YDL069C-U	CGCGTAAGAGTATAGTACAG	0.987701
YDL070W-D	CGACCTTGACCCAGTAGATG	0.988724
YDL070W-U	CGAGCTGTATAAGTTACCAG	0.668864
YDL071C-D	CTTTATCTAGGACGAGGATG	0.967058
YDL071C-U	CCGTATAGCTTAATAGCCAG	0.973661
YDL072C-D	CACTGTTGGTAAGGTCTATG	0.0145785
YDL072C-U	CGCACACGATTAAGGTCCAG	0.0137147
YDL073W-D	CCACTCCTTACATTGGTATG	0.986017
YDL073W-U	CCACTCTAGTAACTTAGCAG	0.906975
YDL074C-D	CCTACCGTCAGGATATTATG	0.112025
YDL074C-U	CTACGCTAATACCTAGTCAG	0.118271
YDL075W-D	CACTAGGTATGGTAAGACTG	0.0154339
YDL075W-U	CCATTGGACTAATACGTCAG	0.0488643
YDL076C-D	CACTGAGGGTTAATAGCCTG	0.947744
YDL076C-U	CGACGTTACTAATGTGTCAG	0.940433
YDL077C-D	CGCGGCAGTTATTTAATCTG	0.0102901
YDL077C-U	CCGTGTCTATAAGTGTTCAG	0.0342852
YDL078C-D	CCCTGACGGAGATTAGTCTG	0.997824
YDL078C-U	CCACGTCATTAACTTCAGAG	0.987683
YDL079C-D	CGACGAGTTGTTAATGTCTG	0.99455
YDL079C-U	CCCGCATTATTATACACGAG	0.993913
YDL080C-D	CCCTACGACTTATATCAGTG	0.992823
YDL080C-U	CGCCTATCTATAATACCGAG	0.976566
YDL081C-D	CCAGGTTTGTAATGCTAGTG	0.256088
YDL081C-U	CATATTGTATAAGGCCCGAG	0.133074
YDL082W-D	CAACTCGACGGATAGACGTG	0.945213
YDL082W-U	CCGTTCATATAATGTCCGAG	0.891104
YDL083C-D	CCTATCTTAGTAGAGAGGTG	0.0128606
YDL083C-U	CGTAATATAGCGTAAGCGAG	0.0145713
YDL084W-D	CCTCTTACGAGATAGCGGTG	0.0199886
YDL084W-U	CGATACAAGTAAGTTGCGAG	0.817295
YDL085W-D	CATCTACTACTAGGCGGGTG	0.987577
YDL085W-U	CCAGTCAGGTAACTATCGAG	0.991702
YDL086W-D	CAACGTGTCGTAATATGGTG	0.989004
YDL086W-U	CGTCGTATCTAAGTATCGAG	0.993446
YDL087C-D	CCTACTTAGTTAGCACTGTG	0.0145796
YDL087C-U	CACGTAGAGTTAATCAGGAG	0.0188671
YDL088C-D-N	CCCACGTATAGCGTACTGGT	0.912771
YDL088C-U	CCAGGACTTACATTCAGGAG	0.711924
YDL089W-D-N	CCATCCGGTAGACGATTGTT	0.0162895
YDL089W-U	CCGATATACTTACAGAGGAG	0.9898
YDL090C-D	CCGCGCTTCTTATCAAATTG	0.096816
YDL090C-U	CCTTACGTGACAGATAGGAG	0.0891587
YDL091C-D	CTAGGAGGTTACAGTCATTG	0.988084
YDL091C-U	CACATCGTTTAACACTGGAG	0.100405
YDL092W-D	CACCTGTGTTGTAAGGATTG	0.0145418
YDL092W-U	CCATTCACGTAAGGGCTGAG	0.942314
YDL093W-D	CCAGCCTTGACAGTTTCTTG	0.97915
YDL093W-U	CCTACGTGAGTAAGATTGAG	0.989268
YDL094C-D	CATACTACGTGGGACAGTTG	0.987726
YDL094C-U	CCCGCGATTGTAATGAATAG	0.915379
YDL095W-D	CCATACTTTACAGCGAGTTG	0.954365
YDL095W-U	CCACGCCTCTAATGTAATAG	0.080788
YDL096C-D	CTTCACTGACTAGCTCGGGT	0.918131
YDL096C-U-N	CCGTGATTGACACTACGTTT	0.105561
YDL097C-D	CTCCTCGATTTGAGATGGGT	0.820691
YDL097C-U-N	CGACCTCTTACAGTGATTTT	0.910601
YDL098C-D	CGCTAGTATTCGATATGGGT	0.940472
YDL098C-U	CTCACTTGGAGAGGTATTTG	0.954656
YDL099W-D	CACCTGCGTAGATTCTGGGT	0.991053
YDL099W-U	CTCTAGCGGAGACGACTTTG	0.824288
YDL100C-D	CTCCTTACGCGGATGATGGT	0.991193
YDL100C-U	CATGCGGTGTAACGAGAAAT	0.0205619
YDL101C-D	CTAGCCGTATGACCTATGGT	0.990407
YDL101C-U	CGCGCAGAGGTTAGATAAAT	0.973041
YDL102W-D	CCTCCTATGCGATTCGTGGT	0.41588
YDL102W-U	CTTACGTCAGGCGTGGCAAT	0.369513
YDL103C-D	CTACTACGCTTCAGCTTGGT	0.0188645
YDL103C-U	CGGACGAGCTTCCATTCAAT	0.0128634
YDL104C-D	CGCCCTATTGTCCATAATGT	0.958022
YDL104C-U	CGCCCAGGATTTCATAGAAT	0.910897
YDL105W-D	CCTTGGACGGTATATGATGT	0.904101
YDL105W-U	CCGCGACGATTGATTAGAAT	0.361573
YDL106C-D	CCGCGTCTAGTATAGTATGT	0.936533
YDL106C-U	CTACTACGATGGCGTCGAAT	0.95843
YDL107W-D	CTCGACGCTGGACGTTATGT	0.985428
YDL107W-U	CGTGGAGCAGTTCGTATAAT	0.836384
YDL108W-D	CCCTGCTGTAGAGGTTATGT	0.0111492
YDL108W-U	CAGAGGGCACTGTTCTTAAT	0.014578
YDL109C-D	CATCCTTGGTCACGGAGTGT	0.986848
YDL109C-U	CTCAGGTACTGTTACGACAT	0.978955
YDL110C-D	CAGGTCTGACGATTTAGTGT	0.992956
YDL110C-U	CACTACGACTTCGGATACAT	0.989419
YDL111C-D	CACTTAGCTTAGACTCGTGT	0.942438
YDL111C-U	CAACGTAGAGTGAGGTACAT	0.0205807
YDL112W-D	CACTGACTTCGAGGTCGTGT	0.987501
YDL112W-U	CCGATTAGAGGTTGACAGAT	0.993701
YDL113C-D	CGGATATTCTTCACAGGTGT	0.973729
YDL113C-U-N	CCGTCATTATCACTGTAGAT	0.990349
YDL114W-D	CATTGGATTAGACCGTGTGT	0.991584
YDL114W-U	CCTGAGGACTTATTCACGAT	0.991885
YDL115C-D	CACTTGATTCGACGGTGTGT	0.44487
YDL115C-U	CTACTTGGGAGATAGTCGAT	0.345365
YDL116W-D	CGACCCGTGATATTCATTGT	0.66606
YDL116W-U	CCCTTTGTAGAGATGAGGAT	0.241086
YDL117W-D	CCTTGTCTGAGAGCCGTTGT	0.960817
YDL117W-U	CATACTTAGGGATCAGGGAT	0.544311
YDL118W-D	CATACTCGTTGAGAGGTTGT	0.262929
YDL118W-U	CACCACTTGCTAGGAGGGAT	0.14516
YDL119C-D	CCAGCCCTGCGATTATTTGT	0.988477
YDL119C-U	CAACTTGTAGGGACGATGAT	0.992223
YDL120W-D	CGACGGCTGATACTCTTTGT	0.929427
YDL120W-U	CCGAGCTACGGATATTTGAT	0.011961
YDL121C-D	CAGTTGCTCAGTTCCCAATT	0.998054
YDL121C-U	CAGGCCAGTTTCTCGAATAT	0.994408
YDL122W-D	CGATGCCCTTTCAGTCAATT	0.983962
YDL122W-U-N	CTGGCGAGATTCGGAATATT	0.990183
YDL123W-D	CGCCGTCTGATTAGAGAATT	0.0196891
YDL123W-U	CCCTGCACTTTGCGTAATAT	0.954051
YDL124W-D	CTCCGGTCGATGGATGAATT	0.992867
YDL124W-U	CTATTGACCGGAGGAGATAT	0.977827
YDL125C-D	CCGCCGGATGTGATATAATT	0.983293
YDL125C-U-N	CGACCCGATGTAGAGATATT	0.24463
YDL126C-D	CAGCTAGAGTTGGCGTAATT	0.947476
YDL126C-U	CCGACCCTATTAGCTGATAT	0.883316
YDL127W-D	CAAGGCGAGGTTGCTACATT	0.987185
YDL127W-U	CTACGTGGACGAGAGCCTAT	0.568913
YDL128W-D	CGGCTGACTATCGTTCCATT	0.985062
YDL128W-U	CCCGTTAGACTATCTGCTAT	0.0222765
YDL129W-D	CGGCGTAGATTGTTAGCATT	0.972694
YDL129W-U	CTATGTGCGGTAAGACGTAT	0.0205467
YDL130W-A-D	CATTTGTAACCAGTTCGCTC	0.984209
YDL130W-A-U	GGCTACGATACATCTTCATC	0.991819
YDL130W-D	CGCGGCGTAGTTATATCATT	0.939711
YDL130W-U	CCTGATCTAGGAGTAGGTAT	0.758535
YDL131W-D	CGGACCTATCTTCAGTCATT	0.997208
YDL131W-U	CCTATGTGGCGTAAGTGTAT	0.997966
YDL132W-D	CCTCTGTTCGAGTGGAGATT	0.949592
YDL132W-U	CTTTCAGAGGTCAGGTGTAT	0.308543
YDL133C-A-D	ATACCAGGGCTAACAGGCTC	0.690478
YDL133C-A-D-S	CGGATACCTGTCTCCATATT	0.960406
YDL133C-A-U	GCCCAGTTACAGGAAAGATC	0.723037
YDL133C-A-U-S	CCTAGCCTGAGAGGGATTAT	0.0556932
YDL133C-A-U-S-N	CCTAGCTGAGAGGGATTATT	0.40271
YDL133W-D	CGACGCTAGTTAGTGAGATT	0.994751
YDL133W-U	CCGAGTACGCCTCATTGTAT	0.0222866
YDL134C-D	CTATTGGATGTCACGGGATT	0.982188
YDL134C-U	CCCGTGAGGCTAGAGATTAT	0.947713
YDL135C-D	CGGCGCGTGTTATAGATATT	0.904142
YDL135C-U	CGCGAGCTAGGCGTACTTAT	0.930828
YDL136W-D	CGCGGATGTCTTACGATATT	0.768324
YDL136W-U	CCGTAGCTCTCATAGGTTAT	0.777217
YDL137W-D	CGCTTCGAGTATGGGATATT	0.961822
YDL137W-U	CCCGATTGAGGCATGGTTAT	0.0238621
YDL138W-D	CTACGGGCTCGATGCCTATT	0.962455
YDL138W-U	CGACCCTGATGATCCTTTAT	0.452086
YDL139C-D	CAATCGCTCGGAGGCGTATT	0.0145775
YDL139C-U	CGCGGAGTATAGAGCTTTAT	0.0317199
YDL140C-D	CAGCCGTGTAGAGTTGTATT	0.0427623
YDL140C-DX	CAGCCGTGTAGAGTTGTATT	0.059909
YDL140C-U	CAGGGATATTGACTACGACT	0.0273482
YDL140C-UX	CAGGGATATTGACTACGACT	0.0239692
YDL141W-D	CGCATGGGCCGATTTGTATT	0.941322
YDL141W-U	CATGTACGAGTAGTAGGACT	0.990942
YDL142C-D	CGCAGCGCGATACCGTTATT	0.96786
YDL142C-U-N	CCCGTCATTCATAGTGACTT	0.899419
YDL143W-D	CCGAGCCTAGTATGCGACTT	0.781288
YDL143W-U	CCGTTAGATTCAGTGTGACT	0.788659
YDL144C-D	CGCGCTATTATACTCGACTT	0.943099
YDL144C-U	CACTGTGACCGAGGGATACT	0.585113
YDL145C-D	CATCGGTCGAGAGGCTACTT	0.842594
YDL145C-U	CTAGTGGCAGGATTGTTACT	0.862539
YDL146W-D	CTGATTGACGGAGTGTACTT	0.77045
YDL146W-U	CTCTAGTAGCGGAGATACCT	0.625491
YDL147W-D	CCCTATGGACTATGTAGCTT	0.0162948
YDL147W-U	CAATGAGTTCGACGTGCCCT	0.0360189
YDL148C-D	CGAGCCTTAGTTCAGTGCTT	0.940885
YDL148C-U	CCGGACTGATGACGTATCCT	0.978906
YDL149W-D	CTCGTGACGTTTGAGCAGTT	0.993946
YDL149W-U	CGTAGTATAGTCATCGTCCT	0.987758
YDL150W-D	CCCTTGCGATTGGTGCAGTT	0.926961
YDL150W-U	CATACAAAGAGAGGTGTCCT	0.989289
YDL151C-D	CACCTAGAGTTCTTGCAGTT	0.106122
YDL151C-U	CGACCTGCTAGATTATTCCT	0.719921
YDL152W-D	CTGCGGATGTTATACGAGTT	0.936669
YDL152W-U-E	TACTAGCGACTGGAGCTCGT	0.764973
YDL153C-D	CGCGCTGAGTTTAGATAGTT	0.00943343
YDL153C-U	CAACAAAGTAGAGGGCTGCT	0.0162939
YDL154W-D	CCACTCGCTTCATAGTAGTT	0.996445
YDL154W-U	CGAGTTATACGACTGTTGCT	0.985158
YDL155W-D	CGAAGCTGTGGTCATTAGTT	0.414834
YDL155W-U	CGGACGGTATTCATTCATCT	0.524384
YDL156W-D	CTGACGTAGTGAGCTTAGTT	0.995719
YDL156W-U	CCGATACCGCGATAGGATCT	0.987984
YDL157C-D	CCATGCCGTCGATGTTAGTT	0.984557
YDL157C-U-N	CCGGCTTTGCAGTATATCTT	0.0128459
YDL158C-D	CATTGTGCGAGGACTCCGTT	0.710277
YDL158C-U	CTAGTACGCGGCAGGTATCT	0.0837071
YDL159W-D	CGATCTTGGGTCACAGCGTT	0.125461
YDL159W-U-N	CTACACGGGTCAGGAGTCTT	0.115614
YDL160C-D	CTGTACGTGCGATACTCGTT	0.12334
YDL160C-U	CACTGTGGACGATACGGTCT	0.219558
YDL161W-D	CTATGCTGCCGACTTGGGTT	0.993983
YDL161W-U	CGGATTCATCGCGTACTTCT	0.995867
YDL162C-D	CTACTTCGCGTGAGCTGGTT	0.988313
YDL162C-U	CAATAGGGTGTGACAGTTCT	0.987217
YDL163W-D	CGGAGCGTTATGATACTGTT	0.0222807
YDL163W-U	CACTGTCTACGATGGGTTCT	0.0248588
YDL164C-D	CAATCGTTAGTGAGGCTGTT	0.936182
YDL164C-U	CAATCCCGCGTATATGTTCT	0.991709
YDL165W-D	CTACGCTTGCGAGTCGTGTT	0.925934
YDL165W-U	CTCAGTCGGGCATGGTTTCT	0.974538
YDL166C-D	CGAGCTACGCTACTATTGTT	0.925693
YDL166C-U	CGACTGCTTCTACACTAAGT	0.989675
YDL167C-D	CGCAGGAGGCTTTGACATTT	0.977757
YDL167C-U	CGTGACGATCTGTTCTAAGT	0.98616
YDL168W-D	CCTTGATGATAGAGGGCTTT	0.988755
YDL168W-U	CTTTCGGACGTATGTGCAGT	0.968967
YDL169C-D	CGAGCGTATGTAGGATCTTT	0.98999
YDL169C-U	CGTCTACGAGTATTTGCAGT	0.991197
YDL170W-D	CACCAGCCGTGACTGTGTTT	0.986054
YDL170W-U	CACGTCACCGTATGTAGAGT	0.987134
YDL171C-D	GTGGTCGCCCAAGCAACAAA	0.969576
YDL171C-U	CCTAGTTCGAGATTGCGAGT	0.983354
YDL172C-D	GGTCTGCCCAAAGTCACAAA	0.768141
YDL172C-U	CCTGTAGTACGAGTATGAGT	0.732676
YDL173W-D	GGTTGCCGCACAAAGCCAAA	0.687108
YDL173W-U	CGATTCTACGGACGCTGAGT	0.680656
YDL174C-D	GGCCTTGCCAAACAGTCAAA	0.97741
YDL174C-U	CACTCGGATTCAGTTCTAGT	0.990524
YDL175C-D	GCGCCCGCACAATTTAGAAA	0.957488
YDL175C-U	CAACCTCGGCGATGAGTAGT	0.0238123
YDL176W-D	GCTGCCTACAAATTCCGAAA	0.96916
YDL176W-U	CATCGTAGACTCCTAGTAGT	0.581379
YDL177C-D	GCCCTCGTGACAAATCGAAA	0.984557
YDL177C-U	CCTGTAGATTGACGTGTAGT	0.98224
YDL178W-D	GCTCCTTACAAAGCCTGAAA	0.978825
YDL178W-U	CATATTGCTTAGAGGGCCGT	0.992559
YDL179W-D	GCTTTCCGCCAAGACATAAA	0.976994
YDL179W-U	CAAGTATGAGGAGTATCCGT	0.685463
YDL180W-D	GCCGGTCGCAAACTCATAAA	0.977269
YDL180W-U	CTGAGCGTAGGATATTCCGT	0.979859
YDL181W-D	GCCGCCTGCCAAGAAGTAAA	0.0908996
YDL181W-U	CAGATACCGTGACCTAGCGT	0.0951932
YDL182W-D	GCTCTCGGCCAAGGAAACAA	0.966199
YDL182W-U	CTACGTCGGCTCATAGTCGT	0.987139
YDL183C-D	GCTTCGCGCCAATTAAACAA	0.90009
YDL183C-U	CAATCCATCCTGGGAGAGGT	0.972414
YDL184C-D	GTGGTCTGCAAACCCAACAA	0.983176
YDL184C-U	CTTACTGATAGCGTAGAGGT	0.993397
YDL185W-D	GCTTTCCGCAAACTGAACAA	0.0214361
YDL185W-U	CAAGCATACCGGACTGAGGT	0.0762948
YDL186W-D	GTGGGTCCTCAAACACACAA	0.99088
YDL186W-U	CTTAGGCTGAGATTCTAGGT	0.993914
YDL187C-D	GTGGGAGCCAAACCTCACAA	0.992656
YDL187C-U	CCATTACTGTAGATGACGGT	0.99579
YDL188C-D	GCGGCCCGAACATATTACAA	0.974082
YDL188C-U	CAGCGTGATTCATTTACGGT	0.0952184
YDL189W-D	GGCCCTAGCAAATTGACCAA	0.966016
YDL189W-U	CACGCTTTAGTCATTGCGGT	0.89565
YDL190C-D	GTCCTCGCAAGAAAGGCCAA	0.987545
YDL190C-U	CAGTATGCTAGATTCCGGGT	0.963692
YDL191W-D	GCCACACGTACCAATAGGGA	0.120706
YDL191W-U	GGCAATTCCAAATCGTCCAA	0.171757
YDL192W-D	GCCTATACCCAACTAATGGA	0.45762
YDL192W-U	GGGCCACGCAAAGATTCCAA	0.587231
YDL193W-D	GGACTGTAAACACTCTTGGA	0.946316
YDL193W-U	GGGCTCTAAACAACGCGCAA	0.979125
YDL194W-D	GCGTCTCTTAAACCTTCTGA	0.66088
YDL194W-U	GGTCCAGTCAAACACGGCAA	0.965684
YDL195W-D	GGCCCTATAAGAATACGTGA	0.0145762
YDL195W-U	GCCTTAGCCAAATAGGGCAA	0.0128619
YDL196W-D-T	GTGACATAACGGCCTTGATT	0.0137173
YDL196W-U	GGGACCGCCAAAGCTATCAA	0.0171493
YDL197C-D	GGACCTACCCAATGTCTTGA	0.987665
YDL197C-U	GGCCTTGGAACAACACTCAA	0.180327
YDL198C-D	GCCCGAACAGTTGTGAAATA	0.969611
YDL198C-U	GCTTCCAGAAACGTACTCAA	0.978739
YDL199C-D	GGTCGGACACTACACCAATA	0.97958
YDL199C-U	GGCCTCCGAAGAAAGCTCAA	0.966236
YDL200C-D	GCCCGGCAAGGCAAGTAATA	0.901729
YDL200C-U	GCGCGTACAACAACGGTCAA	0.986168
YDL201W-D	GGTTGTAACACACCACCATA	0.988499
YDL201W-U	GTCGCCGAAACCATATTCAA	0.987477
YDL202W-D	GGGAATCCGCAACACCTATA	0.740621
YDL202W-U	GCTCGTCCGAAACCAGAGAA	0.421555
YDL203C-D	GCCGTCTTGACAACCTTATA	0.979453
YDL203C-U	GGTCTATGCAAACACCCGAA	0.984275
YDL204W-D	GCGCCGCATTAACTAAACTA	0.98234
YDL204W-U	GGCCCGCACACAATTAGGAA	0.979669
YDL205C-D	GCCAGAACTTTGGACAACTA	0.931849
YDL205C-U	GCCGCCCAATTCAAATGGAA	0.978424
YDL206W-D	GGAGAATCTACCGCAACCTA	0.119562
YDL206W-U	GCCCTCACGAAATAGTTGAA	0.0984235
YDL207W-D	GACAGCGTTACAAGTACCTA	0.906667
YDL207W-U	GCCCGAACCACAATGTTGAA	0.0161704
YDL208W-D	GTGAGACTAATCCAACCCTA	0.941124
YDL208W-U	GGGTGCCACGCCAAACATAA	0.14476
YDL209C-D	GCGCGATTTACAATACCCTA	0.928623
YDL209C-U	GGCCCTCCTGAAACAGATAA	0.939664
YDL210W-D	GCCTAATTTACAAGCGCCTA	0.985033
YDL210W-U	GGTGACATCAAACGCCCTAA	0.412217
YDL211C-D	GCCGTATTTACAACTCGCTA	0.0214309
YDL211C-U	GGGCAGCGAACAATCCCTAA	0.982959
YDL212W-D	GCGCCCGTATTCTAAATCTA	0.925682
YDL212W-U	GGCTTCAGAACAACCTCTAA	0.93757
YDL213C-D	GAATTGGGTACAAGCCTCTA	0.971087
YDL213C-U	GGCACTATCAAATCCCGTAA	0.0102736
YDL214C-D	GGTAATACGCAACTCCTCTA	0.00771405
YDL214C-U	GTGAGCGAAACACCGCGTAA	0.0676271
YDL215C-D	GCCGAACCTTCAACAGAGTA	0.98226
YDL215C-U	GCTCTACCGAAACACTGTAA	0.97972
YDL216C-D	GCGCCTATTACACAAACGTA	0.953928
YDL216C-U	GCCCTGATAACAAGGTGTAA	0.294517
YDL217C-D	GGTCAGTCAACACTAACGTA	0.0111485
YDL217C-U	GCCGCCGCTCAATAAATTAA	0.0128643
YDL218W-D	GTCCGAACTATCAACACGTA	0.97731
YDL218W-U	GCGCACGAGAAACCTCTTAA	0.959487
YDL219W-D	GCGGCCACTTACACAAATTA	0.98587
YDL219W-U	GCCGTAGCCACAAGAGTTAA	0.979019
YDL220C-D	GCCGTCGTTCCAATTCATTA	0.0180049
YDL220C-U	GGCGTTCCTAAACATCAACA	0.0145735
YDL221W-D	GCCCTGATACCCAAAGATTA	0.0941647
YDL221W-U-T	GGCCGTCATAACGGAACATT	0.0761275
YDL222C-D	GCGGACGGAACATACTATTA	0.989693
YDL222C-U	GTACGCGCCACAAGGTAACA	0.995165
YDL223C-D	GCTACCTCAAGACGTACTTA	0.90777
YDL223C-U	GCTCCCTTTGAAGAAACACA	0.884644
YDL224C-D	GCACTTACGGCAATACCTTA	0.988334
YDL224C-U-E	GGCTTTACGAAACTCACACG	0.994744
YDL225W-D	GGACTGAATCAACCTCCTTA	0.988634
YDL225W-U	GGGCACGTAACAATTCCACA	0.0179927
YDL226C-D	GCTACTAGGCAACTTCCTTA	0.80234
YDL226C-U	GCGCGGTTTCAATAAAGACA	0.768678
YDL227C-D	GCGCGTCAAGTACAAAGTTA	0.995053
YDL227C-U	GGGCACACCCAATTTAGACA	0.987528
YDL229W-D	GCCCAGTGTCAATTTCGTTA	0.976917
YDL229W-U	GCCCAAGTACAATTTCGACA	0.930354
YDL230W-D-N	GCAGGAAAACCACAGGGTTA	0.992145
YDL230W-U-N	GTGCGAACCAACGTCTACAT	0.988988
YDL231C-D	GAGTCCTCTCCAACTTGTTA	0.782993
YDL231C-U	GCCCGACTGAAATAGGTACA	0.963271
YDL232W-D	GTCAGAACCCACTCGATTTA	0.725269
YDL232W-U	GGGTACTCCACAACATTACA	0.0142696
YDL233W-D	GATCGGCCTCAATTCCTTTA	0.99328
YDL233W-U	GGGATCACAACCACGTTACA	0.986242
YDL234C-D	GCACCGTATCAATCCGTTTA	0.996278
YDL234C-U-N	GCCGTACACACAGGTTACAT	0.0214285
YDL235C-D	GCTACTTCGCAACCTGTTTA	0.903477
YDL235C-U	GGCCCTTATGAACAATACCA	0.939972
YDL236W-D	GGGCTTACTCAACATCAAAC	0.995026
YDL236W-U-N	GGCGTCAAGACACGTACCAT	0.980955
YDL237W-D	GCGCGGAATGAACCTCAAAC	0.998154
YDL237W-U	GCGTTGAACACAAGTACCCA	0.0137215
YDL238C-D	GCTCCTCGCTAATAAGAAAC	0.974807
YDL238C-U	GCCACTTAGAAATTAGCCCA	0.939344
YDL239C-D	GGTCCAGAATATCCTACAAC	0.963961
YDL239C-U	GGCCAGAAGAAATCGTCCCA	0.974678
YDL240W-D-T	GGGAATGAACACTCGCCATT	0.0392179
YDL240W-U	GTGGATAACACAACTTCCCA	0.923413
YDL241W-D-N	GAGACCCACTTAATGGCAAT	0.455852
YDL241W-U	GGGCACACTAGGAAACTCCA	0.99313
YDL242W-D	GGGATAGAATCACCCTCAAC	0.994574
YDL242W-U	GGTGACTCCAAAGAACTCCA	0.997139
YDL243C-D	GTAGGTAACACATCCTCAAC	0.676394
YDL243C-U	GAGAATCGGAAACTCCTCCA	0.391964
YDR001C-D	GGTATTAACACACGCTCAAC	0.971559
YDR001C-U	GACAGTACCACAAGGGTCCA	0.93817
YDR002W-D	GGGATAAGCACACCGTCAAC	0.0463105
YDR002W-U	GGCTACCGCAAATAATTCCA	0.0154357
YDR003W-D	GGGCTCACACGAACTAGAAC	0.0385506
YDR003W-U	GCCGCGTATAAATCTTTCCA	0.965338
YDR004W-D	GGGTCTATACACACACGAAC	0.970461
YDR004W-U-N	GGCCGGACTAAACATACGCT	0.95225
YDR005C-D	GATTCTCAATAAGCCCGAAC	0.912041
YDR005C-U	GCCAACTACCTGAAAGGGCA	0.931338
YDR006C-D	GCGTGTGAATAATACGGAAC	0.0846084
YDR006C-U	GTTCGCCACCAAGGAAATCA	0.973369
YDR007W-D	GCCGCCGGATACAGAATAAC	0.837656
YDR007W-U	GGTCCCTCACAAGTAAATCA	0.872883
YDR008C-D	GCTCCGACTGAAGAACTAAC	0.350666
YDR008C-U	GCCGGGCTTAAATTGAATCA	0.0188621
YDR009W-D-N	GCACGGAAGAATCTCTAACT	0.973654
YDR009W-U	GCCGACGTTAAATACACTCA	0.981186
YDR010C-D	GCCCGGCACATAGAAGTAAC	0.963958
YDR010C-U	GGCTAAGGGACAACACCTCA	0.965101
YDR011W-D	GCGCTGAAGAGAACCGTAAC	0.966515
YDR011W-U	GGGATCACTAAACTACCTCA	0.969227
YDR013W-D	GCGACGACAGAACTCTTAAC	0.0617294
YDR013W-U	GGCCGAACTATAAATCCTCA	0.96067
YDR014W-D	GCGTCCGTATAATCAAACAC	0.968332
YDR014W-U	GAACCCGTCACAAGGTGTCA	0.966933
YDR015C-D	GCCGCCGTGATAAGAAACAC	0.972921
YDR015C-U	GCGGCCAATAGTAAACTTCA	0.975559
YDR016C-D	GGGCATAAGGTCAACCACAC	0.0119763
YDR016C-U	GGCTTGTTCAAATCCCTTCA	0.0837231
YDR017C-D	GGGTATCGAACACCAGACAC	0.190615
YDR017C-U-T	GGCTTTTAAACCGCTTCATT	0.105189
YDR018C-D	GGCTCATTAAGAAGGTACAC	0.00942873
YDR018C-U	GCTTAGACCAAAGGAGTTCA	0.972621
YDR019C-D	GGCTTCACATAAGTAACCAC	0.961992
YDR019C-U-N	GGCATCCTAAATCCGTTCAT	0.971557
YDR020C-D	GCCGAGTTAAGAAGCACCAC	0.96693
YDR020C-U	GGCGAACCCAAAGCATTTCA	0.97122
YDR021W-D	GGTGACAGACGAACTACCAC	0.90773
YDR021W-U	GGACAGCCAACCAAGTTTCA	0.957105
YDR022C-D-E	GGTCGATAATAACACGCCAT	0.951199
YDR022C-U	GCTCTCCGTAAACGCAAAGA	0.965879
YDR023W-D	GCCATTAACGAATTACGCAC	0.893826
YDR023W-U-N	GGTGCAACCCAACTCTAAGA	0.96696
YDR024W-D	GACTAATAACCATCGGGCAC	0.182941
YDR024W-U	GGTTCACACCAACTCTAAGA	0.520301
YDR025W-D	GAAGTACGCTCAAGACCGAC	0.447885
YDR025W-U	GCCCAGGCTAAATGTTAAGA	0.595664
YDR026C-D	GTGTCTAACCACAAAGCGAC	0.973969
YDR026C-U	GGCTAGAACCAATTCCCAGA	0.972075
YDR027C-D	GACTAACCCACATTGGTGAC	0.00820237
YDR027C-U-N	GGCCCTAATTAAAGCCAGAT	0.483752
YDR028C-D-N	GCGACCCTATAATTCTTGAT	0.01371
YDR028C-U	GGTGCTACCAACCAACTAGA	0.158836
YDR029W-D	GTTTCCACAGACGCAAATAC	0.149943
YDR029W-U	GTGGACCATACAACCCTAGA	0.883365
YDR030C-D	GCGCTAACCTTTCAGAATAC	0.980163
YDR030C-U	GGGCATCTTAAACCACACGA	0.960119
YDR031W-D	GCGCGGGAGTAATATAATAC	0.0514007
YDR031W-U-N	TGGTACATCCAAGCAACCGA	0.970273
YDR032C-D	GGAGCCCACTAATTTCATAC	0.0154203
YDR032C-U	GGATGTCACCAACTAACCGA	0.0432471
YDR033W-D	GAAGCATACCCACGTTATAC	0.0171509
YDR033W-U	GCCGGAATCCAAGATACCGA	0.974934
YDR034C-D	GAAGGATCTCGAACACCTAC	0.983748
YDR034C-U	GCGCACATTAAACTTACCGA	0.845458
YDR035W-D	GATTACGACGAATGACCTAC	0.980338
YDR035W-U	GGAGTACCAACATATCCCGA	0.9856
YDR036C-D	GGTACATAACCAGTCTCTAC	0.979441
YDR036C-U	GATAGCTCTAAACTTCCCGA	0.997087
YDR037W-D	GATAGTGAACCACCTTCTAC	0.933802
YDR037W-U	GGCATTTCTAAACACTCCGA	0.94532
YDR041W-D	GGCTATTACTCAATCCGTAC	0.934372
YDR041W-U	GAGACGACCCAATTACGCGA	0.968868
YDR042C-D	GGAATACGAGTCAAGTGTAC	0.902817
YDR042C-U	GAAGAGTCTACAACCCGCGA	0.922402
YDR043C-D	GCGACCACATAAGTCTTTAC	0.992047
YDR043C-U	GCAGAACGTAAAGCCCTCGA	0.487517
YDR044W-D	GCACAGTACGTCAAGTTTAC	0.930832
YDR044W-U	GCCATAACCCAATGTTTCGA	0.977324
YDR045C-D	GCGCTCGACTAAGAGAAACC	0.0291265
YDR045C-U	GGCCTAACTCAACAGACGGA	0.0805442
YDR046C-D	GCGCATAATGTTTACCAACC	0.981951
YDR046C-U	GCCACAGTTATTAAAGCGGA	0.982998
YDR047W-D	GAGAGTAATTCACCTCAACC	0.904652
YDR047W-U	GATAATTCCCAACCATCGGA	0.727876
YDR048C-D	GCCATAGTACGAAGGACACC	0.978388
YDR048C-U	GCCTGCTCTAAATTAAGGGA	0.97204
YDR049W-D	GCCGCGTAACGATCAGTAAG	0.968654
YDR049W-U	GGATCTAAGACACGGTCACC	0.962969
YDR050C-D1	CTTATATCGGTAGCAGGATG	0.0760722
YDR050C-D1X	CTTATATCGGTAGCAGGATG	0.0770999
YDR050C-D2	GCTCGCTAATCACGTTTAAG	0.0128274
YDR050C-U1	CCTCTGAGTAAATACGGAGA	0.049865
YDR050C-U1X	CCTCTGAGTAAATACGGAGA	0.0443261
YDR050C-U2	GTACATAACTTCAAGCGACC	0.0136382
YDR051C-D	GCCGAGTACATCTTTAACAG	0.970623
YDR051C-U	GGACTATACTCAATTCGACC	0.917777
YDR052C-D	GGCTTATACTAATCTCCCAG	0.0154369
YDR052C-U-N	GCTATCTACGAATTAGGACT	0.0145797
YDR053W-D	GCCGCTTTACTAATCTTCAG	0.0137213
YDR053W-U	GCCTACTATCGAAGATTACC	0.012863
YDR054C-D	GAACCTAGCGTAATACTGAG	0.0145526
YDR054C-U	GAAGCGTGACGAATCTTACC	0.970789
YDR055W-D	GATCCACGGACCTCGATTAG	0.969147
YDR055W-U	GGGATAGAGCACCATAACCC	0.978409
YDR056C-D	GGATGACTCGTAATCGTTAG	0.925326
YDR056C-U	GAGAGTAAGGAATGCCACCC	0.942971
YDR057W-D	GATCTATACCCACCTGTTAG	0.969762
YDR057W-U	GGGCACAGAGTAACATACCC	0.941433
YDR058C-D-N	ATTCTGACGGCCAAGGCTGT	0.971684
YDR058C-U	TAGTGACGCTCAGATCCCTG	0.980949
YDR059C-D	GGACTCTCACTACACTTTAG	0.980184
YDR059C-U-N	GGCACAGGATAAGATACCCT	0.969968
YDR060W-D	GTGAAGCATCTTTACGAACG	0.929524
YDR060W-U	GGATCACCATAATAGTACCC	0.042869
YDR061W-D	GGACTACACTCTTCATAACG	0.948583
YDR061W-U-N	GTTAAGATCCATTACGCCCT	0.966203
YDR062W-D	GACCCTAGAGCATCTTAACG	0.920886
YDR062W-U	GCCAAGAAAGAATGTTGCCC	0.957474
YDR063W-D	GAGCATTATTAACCTGGACG	0.978772
YDR063W-U	GAAGATTTAGCAAGTCTCCC	0.513355
YDR064W-D	GAGCCAGGACGCTTAATACG	0.0137164
YDR064W-U	GACAGAGGTTCAACATTCCC	0.0256999
YDR065W-D	GATTACTAGCCACCGATACG	0.841553
YDR065W-U	GAACAGTCGATAAGACGGCC	0.963443
YDR066C-D	GCGACTCCATTAACTATACG	0.977745
YDR066C-U-E	GGGTTACCACCTATATGCCG	0.949097
YDR067C-D	GTACACTCTTGCTAACTACG	0.888509
YDR067C-U	GTAGTTATTCAACGCACTCC	0.93372
YDR068W-D	GGGCTTATCATACACTTACG	0.958594
YDR068W-U-N	GGTCATTTCAATCGTCTCCT	0.971899
YDR069C-D	GAACTGGCTTGAATGTTACG	0.581331
YDR069C-U	GACTCTATTCAAGGTTCTCC	0.0848199
YDR070C-D	GAAGTAGTTTGAATCAGCCG	0.980101
YDR070C-U-N	GCGTTATAATAAGAGGTCCT	0.965955
YDR071C-D	ACTCACTCGCAGATGGGATG	0.909461
YDR071C-U	CCTAATGACCAAGGAGGCGA	0.900191
YDR072C-D	GAGATGTCCTTAACGCTCCG	0.976218
YDR072C-U	GGATTTACACCAGGCTGTCC	0.980029
YDR073W-D	GCGACAGGTTTAACTCAGCG	0.965556
YDR073W-U-N	GGTATATCTGAATCCATTCC	0.970329
YDR074W-D	CCAACTCGGGTTAATGGATG	0.744258
YDR074W-U	CCAGCCTGTAAAGGTGTCGA	0.92567
YDR075W-D	GCCTTACTTCTAATGACTCG	0.979939
YDR075W-U	GAAGCAATAACAGCCGTTCC	0.0188554
YDR076W-D	GCACTTGTGTAACTACGTCG	0.973825
YDR076W-U	GCTAATCGCTAATTCGTTCC	0.955681
YDR077W-D	GATCTTACTACACGGGCAGG	0.975303
YDR077W-U	GCATTAACGGGAACTAGAGC	0.0316704
YDR078C-D	GTAAGACGATTTCACAGAGG	0.974624
YDR078C-U	GCACCGTAACCATTAGTAGC	0.985287
YDR079W-D	GACAGCTACTTACACCGAGG	0.970072
YDR079W-U	GCCCTGTAGTTCAATTTAGC	0.869323
YDR080W-D	GATCATTTACCACTCTACGG	0.912752
YDR080W-U	GTGTAACTCCACATTAACGC	0.671679
YDR081C-D	GGTTAATCTCCATGTTGCGG	0.935306
YDR081C-U	GTAGATATACCTAACCACGC	0.934065
YDR082W-D-N	GATCGAACCGTACTTATCGG	0.938355
YDR082W-U-N	GATAGACCTTAATCACCGCT	0.148999
YDR083W-D	GATTCGTTACCAGCTCTCGG	0.881994
YDR083W-U	GGATAGGATACACTACCCGC	0.84875
YDR084C-D	GAGGTCACTCCATCTTTCGG	0.971315
YDR084C-U	GGCCAACAAATAACTTGCGC	0.0119972
YDR085C-D	GACTACTCGCCATACTTGGG	0.780291
YDR085C-U	GACTCAAAGGAATAGTTCGC	0.97016
YDR086C-D-N	GAAGCAAACACATCCTTGGT	0.0240103
YDR086C-U	GCGGTTAATAGACATTTCGC	0.00857607
YDR087C-D	GGATACGTCCTTCAACCATG	0.0180062
YDR087C-U	GGGCTAGTAAGATATTTCGC	0.0145786
YDR088C-D	GGGCCACTACTCCTAATATG	0.0162897
YDR088C-U	GGATTAGTACCACTCACGGC	0.0128634
YDR089W-D	GTGTCACCTACCGTACTATG	0.0265596
YDR089W-U	GGATCTAATACCATTCCGGC	0.995796
YDR090C-D	GACGGTACTCCATTTGTATG	0.993427
YDR090C-U	GAGACTACTGAACCTTCGGC	0.995414
YDR091C-D	GAGGGTTCTCCACTTCACTG	0.930568
YDR091C-U	GAGATTTACTAACCCTCTGC	0.177991
YDR092W-D	GGTCGATATAGACGTTACTG	0.892852
YDR092W-U	GACTACCTAATACGACGTGC	0.071807
YDR093W-D-N	GGTCACCCTATCATACTCTG	0.994141
YDR093W-U	GATATTTCCGAATCCCTTGC	0.996328
YDR094W-D	GGTACAGTTATATCGACGTG	0.943203
YDR094W-U	GGATACCACCTAACTGTTGC	0.846208
YDR095C-D	GATCGCGTTACATTTACGTG	0.983154
YDR095C-U	GACTACCACTAAGACTTTGC	0.991249
YDR096W-D	GACCCTTATCCAGTCTTGTG	0.957982
YDR096W-U	GAGACTAAGTTCGGAGAATC	0.810347
YDR097C-D	GGACCTGACTCACCTTTGTG	0.968829
YDR097C-U	GGCCTACAGTCTAACTAATC	0.985333
YDR098C-D	GAACCGACTTGACTACATTG	0.992597
YDR098C-U	GACCACCGATAAGGCTAATC	0.988427
YDR099W-D	GTTAGGTCCATCCGCCATTG	0.978605
YDR099W-U	GCCGGACCTATAATCTAATC	0.996148
YDR100W-D	GACACCGACCTACGTGATTG	0.695106
YDR100W-U	GCGTACATACCAGGTTAATC	0.995541
YDR101C-D	GAGGGATCTTCCACTCCTTG	0.98566
YDR101C-U	GGTTAGACTACCATTCCATC	0.971043
YDR102C-D	GCAGGTTCACGACTACTTTG	0.985642
YDR102C-U	GCCACCGCTTAATTTAGATC	0.940172
YDR103W-D	GCCCTCACTTAGAGTCAAAT	0.10428
YDR103W-U	GGACACTCTTAATTCCGATC	0.0814241
YDR104C-D	GCGGCATACGTTCGTCAAAT	0.982698
YDR104C-U	GCCGTGAACTTAACTCGATC	0.982681
YDR105C-D	GCCGAGCGAGTAGATTAAAT	0.987613
YDR105C-U-N	GTACCTCGTAACATTAGATC	0.155468
YDR107C-D	GGTACTTGCCATCCGTCAAT	0.992022
YDR107C-U	GTTAGACCTACAGACCTATC	0.917016
YDR108W-D	GACCGTAGACTGTTCTGAAT	0.892101
YDR108W-U-N	GCTAACCCGTAATTGTATCT	0.943778
YDR109C-D	GTACCGCAGATCCTTTGAAT	0.993957
YDR109C-U	GCCCGTATGGTAACATTATC	0.991354
YDR110W-D	GATAGCGACTTACGCCTAAT	0.0313917
YDR110W-U	GGCTAACGTACAGGACACTC	0.906081
YDR111C-D	GCTGACTACTTACCGCTAAT	0.987143
YDR111C-U	GTGAGTTACACTAAGCCCTC	0.990857
YDR112W-D	GTACGCGCAGTATCGGTAAT	0.983452
YDR112W-U	GGGTACTAGACACTATCCTC	0.985459
YDR113C-D	GCGCGGGCATACTATTTAAT	0.939707
YDR113C-U	GGTTTGACCACCTATATCTC	0.0102863
YDR114C-D	GGGTCCAGCCTAGTTCACAT	0.965021
YDR114C-U	GGTGATTATCCTAACCTCTC	0.943824
YDR115W-D	GAAGAGGTGTTACCAGACAT	0.974297
YDR115W-U	GAGGGCCTTGAACTTCTCTC	0.967986
YDR116C-D	GGTATTCGCATCCCGGACAT	0.939435
YDR116C-U	GAGGACCCTACATTATTCTC	0.533325
YDR117C-D	GGCAGAGTCCGTTACACCAT	0.988078
YDR117C-U	GAAGCACCTTTCACGAAGTC	0.99077
YDR118W-D	GATAGGTTTCTCCATCCCAT	0.948274
YDR118W-U-N	GCCAGCCTCTAATTTACGTC	0.965176
YDR119W-D	GACGTTATGCCAGTTCCCAT	0.973594
YDR119W-U	GAGCATACTTTAACACCGTC	0.985901
[truncated: 9,842 more rows]
